1 **Title:** The dark side of the mean: brain structural heterogeneity in schizophrenia and its  
2 polygenic risk.

3

4 **Authors:** Dag Alnæs<sup>1\*</sup>, PhD, Tobias Kaufmann<sup>1</sup>, PhD, Dennis van der Meer<sup>1</sup>, PhD, Aldo  
5 Córdova-Palomera<sup>1</sup>, PhD, Jaroslav Rokicki<sup>1</sup>, PhD, Torgeir Moberget<sup>1</sup>, PhD, Francesco  
6 Bettella<sup>1</sup>, PhD, Ingrid Agartz<sup>1,2</sup>, PhD, Deanna M. Barch<sup>3</sup>, PhD, Alessandro Bertolino<sup>4</sup>, PhD,  
7 Christine L. Brandt<sup>1</sup>, PhD, Simon Cervenka<sup>2</sup>, PhD, Srdjan Djurovic<sup>1,5</sup>, PhD, Nhat Trung  
8 Doan<sup>1</sup>, PhD, Sarah Eisenacher<sup>6</sup>, PhD, Helena Fatouros-Bergman<sup>2</sup>, PhD, Lena Flyckt<sup>2</sup>, PhD,  
9 Annabella Di Giorgio<sup>4,7</sup>, PhD, Beathe Haatveit<sup>1</sup>, PhD, Erik G. Jönsson<sup>1,2</sup>, PhD, KaSP  
10 Consortium<sup>8</sup>, Peter Kirsch<sup>6</sup>, PhD, Martina J. Lund<sup>1</sup>, MA, Andreas Meyer-Lindenberg<sup>6,9</sup>, MD,  
11 Giulio Pergola<sup>4</sup>, PhD, Emanuel Schwarz<sup>6</sup>, PhD, Olav B. Smeland<sup>1</sup>, PhD, Tiziana Quarto<sup>4</sup>,  
12 PhD, Mathias Zink<sup>6</sup>, MD, Ole A. Andreassen<sup>1</sup>, PhD, Lars T. Westlye<sup>1,10</sup>, PhD

13

14 <sup>1</sup> Norwegian Centre for Mental Disorders Research (NORMENT), KG Jebsen Centre for  
15 Psychosis Research, Division of Mental Health and Addiction, Oslo University Hospital, and  
16 Institute of Clinical Medicine, University of Oslo, Norway

17 <sup>2</sup> Centre for Psychiatry Research, Department of Clinical Neuroscience, Karolinska Institutet,  
18 Stockholm, Sweden.

19 <sup>3</sup> Department of Psychological and Brain Sciences, Washington University in St. Louis, USA,

20 <sup>4</sup> Psychiatric Neuroscience Group, Department of Basic Medical Sciences, Neuroscience and  
21 Sense Organs, University of Bari “Aldo Moro”, Bari, Italy.

22 <sup>5</sup> Department of Medical Genetics, Oslo University Hospital, Oslo, Norway

23 <sup>6</sup> Central Institute of Mental Health, University of Heidelberg, Mannheim, Germany.

24 <sup>7</sup> Fondazione Casa Sollievo della Sofferenza IRCCS, San Giovanni Rotondo, Italy.

25 <sup>8</sup> Karolinska Schizophrenia Project (KaSP) Consortium

26 <sup>9</sup>Medical Faculty Mannheim, University of Heidelberg, Mannheim, Germany

27 <sup>10</sup>Department of Psychology, University of Oslo, Norway.

28

29

30 **\*Corresponding author:** Dag Alnæs Email: [dag.alnas@psykologi.uio.no](mailto:dag.alnas@psykologi.uio.no)

31 Postal address: Oslo University Hospital, PO Box 4956 Nydalen, 0424 Oslo, Norway

32 Telephone: +47 23 02 73 50, Fax: +47 23 02 73 33

33

34

35 **Key Points**

36 **Question:** Is schizophrenia and its polygenic risk associated with brain structural  
37 heterogeneity in addition to mean changes?

38 **Findings:** In a sample of 1151 patients and 2010 controls, schizophrenia was associated with  
39 increased heterogeneity in fronto-temporal thickness, cortical, ventricle, and hippocampal  
40 volumes, besides robust reductions in mean estimates. In an independent sample of 12,490  
41 controls, polygenic risk for schizophrenia was associated with thinner fronto-temporal  
42 cortices and smaller CA2/3 of the left hippocampus, but not with heterogeneity.

43 **Meaning:** Schizophrenia is associated with increased inter-individual differences in brain  
44 structure, possibly reflecting clinical heterogeneity, gene-environment interactions, or  
45 secondary disease factors.

46

47 **Abstract**

48 **Importance:** Between-subject variability in brain structure is determined by gene-  
49 environment interactions, possibly reflecting differential sensitivity to environmental and  
50 genetic perturbations. Magnetic resonance imaging (MRI) studies have revealed thinner  
51 cortices and smaller subcortical volumes in patients. However, such group-level comparisons  
52 may mask considerable within-group heterogeneity, which has largely remained unnoticed in  
53 the literature

54 **Objective:** To compare brain structural variability between individuals with SZ and healthy  
55 controls (HC) and to test if respective variability reflects the polygenic risk for SZ (PRS) in  
56 HC.

57 **Design, Setting, and Participants:** We compared MRI derived cortical thickness and  
58 subcortical volumes between 2,010 healthy controls and 1,151 patients with SZ across 16  
59 cohorts. Secondly, we tested for associations between PRS and MRI features in 12,490  
60 participants from UK Biobank.

61 **Main Outcomes and Measures:** We modeled mean and dispersion effects of SZ and PRS  
62 using double generalized linear models. We performed vertex-wise analyses for thickness,  
63 and region-of-interest analysis for cortical, subcortical and hippocampal subfield volumes.  
64 Follow-up analyses included within-sample analysis, controlling for intracranial volume and  
65 population covariates, test of robustness of PRS threshold, and outlier removal.

66 **Results:** Compared to controls, patients with SZ showed higher heterogeneity in cortical  
67 thickness, cortical and ventricle volumes, and hippocampal subfields. Higher PRS was  
68 associated with thinner frontal and temporal cortices, as well as smaller left CA2/3, but was  
69 not significantly associated with dispersion.

70 **Conclusion and relevance:** SZ is associated with substantial brain structural heterogeneity  
71 beyond the mean differences. These findings possibly reflect higher differential sensitivity to

72 environmental and genetic perturbations in patients, supporting the heterogeneous nature of  
73 SZ. Higher PRS for SZ was associated with thinner fronto-temporal cortices and smaller  
74 subcortical volumes, but there were no significant associations with the heterogeneity in these  
75 measures, i.e. the variability among individuals with high PRS were comparable to the  
76 variability among individuals with low PRS. This suggests that brain variability in SZ results  
77 from interactions between environmental and genetic factors that are not captured by the  
78 PGR. Factors contributing to heterogeneity in fronto-temporal cortices and hippocampus are  
79 thus key to further our understanding of how genetic and environmental factors shape brain  
80 biology in SZ.

## 81 **Introduction**

82 Schizophrenia (SZ) is a severe psychiatric disorder with a lifetime prevalence of about 1%,  
83 rendering it a leading cause of disability worldwide with 26 million people affected<sup>1</sup>. While  
84 genetic and environmental factors contributing to disease risk have been identified, the  
85 pathophysiology still remains elusive<sup>2,3</sup>. Patients diagnosed with SZ display substantial  
86 heterogeneity in terms of their clinical characteristics and symptoms<sup>4</sup>, treatment response<sup>5</sup> and  
87 long term prognosis<sup>6</sup>. The notion that the observed heterogeneity stems at least partially from  
88 distinct subtypes of patients with differentially affected neurobiology and clinical and  
89 cognitive profiles<sup>7-9</sup>, has not been fully confirmed<sup>10</sup>, and the question of whether there is one  
90 unifying pathophysiological process shared across patients, or a multitude of disease  
91 processes leading to a similar clinical syndrome remains salient<sup>11</sup>.

92 SZ is associated with widespread brain abnormalities, with the most robust group-  
93 level mean structural differences being ventricle enlargement, reduced thickness and area of  
94 frontal and temporal cortices, as well as reduced hippocampal and amygdala volumes<sup>12-14</sup>.  
95 However there is also substantial variability between patients<sup>7,8,15,16</sup>, presenting a major  
96 challenge for achieving imaging based diagnostic predictions with any clinical utility<sup>17,18</sup>.  
97 Rather than simply reflecting noise, this inter-individual variability in brain structure may  
98 possibly carry relevant information regarding gene-environment interactions related to the  
99 individual sensitivity to environmental and genetic perturbation. Only a few studies have  
100 investigated whether heterogeneity differs between healthy participants and SZ patients. One  
101 functional imaging study reported increased heterogeneity in both connectivity and spatial  
102 extent of functional brain networks in SZ<sup>19</sup>. Regions with altered spatial variance in functional  
103 networks included areas previously implicated in SZ, such as auditory and sensorimotor  
104 cortices and basal ganglia, and networks showing increased heterogeneity overlapped with  
105 those showing mean volume differences, implying that the mean and variance measures

106 provide complementary but converging results<sup>20</sup>. A recent meta-analysis reported increased  
107 inter-individual volumetric variability in several cortical and subcortical structures, including  
108 the temporal lobe, thalamus, hippocampus and amygdala in SZ, and lower variability in the  
109 anterior cingulate cortex (ACC)<sup>15</sup>. These results point to the importance of modeling  
110 heterogeneity as well as mean changes. Detecting brain regions that are more homogenous in  
111 patients could point to a primary role in a shared underlying SZ pathophysiology, while  
112 regions of increased heterogeneity might be informative of putative subtypes of disease, or  
113 possibly reflect regional differences in the sensitivity to genetic and environmental  
114 perturbations.

115 SZ is highly heritable<sup>21</sup>, motivating the ongoing efforts to identify intermediate brain  
116 phenotypes associated with disease liability in order to elucidate the pathway from genes to  
117 illness manifestation. Several SZ risk loci have been identified<sup>22</sup>, but the individual  
118 contribution of each identified variant is weak and as of yet no common variants have been  
119 conclusively linked to the disease. Polygenic risk scores (PRS) for SZ, which represent a  
120 weighted sum of common genetic SZ risk alleles, have been proposed to account for the  
121 polygenic nature of disease risk and to increase predictive power<sup>23</sup>. Beyond being predictive  
122 of case-control status<sup>22</sup>, SZ PRS have been associated with negative symptoms, anxiety and  
123 lower cognitive ability in adolescents<sup>24</sup>. Polygenic burden has also been linked to reduced  
124 cortical thickness, as well as with prefrontal working memory-, and hippocampal encoding-  
125 related activation and connectivity in both patients and healthy participants<sup>25-28</sup>. This is in line  
126 with findings implicating both the frontal cortices and hippocampus as core regions in SZ  
127 pathophysiology<sup>29</sup>. Polygenic risk for SZ is however only weakly associated with subcortical  
128 volumes<sup>30</sup>. Importantly, risk alleles could also exert their effect by influencing the  
129 environmental sensitivity, which could be reflected in the phenotypic variability between  
130 individuals<sup>31</sup>.

131 Thus, revealing brain structures with higher or lower heterogeneity in SZ could  
132 facilitate discovery of intermediate brain phenotypes that may serve to identify putative sub-  
133 types<sup>8,32</sup> of the disease, as well as by identifying phenotypes that are primary or common in  
134 the neurobiology of SZ<sup>15</sup>. Further, investigating how the genetic architecture of disease risk is  
135 related to brain heterogeneity could reveal regions in which the cumulative burden of  
136 common risk alleles influence the phenotypic variance<sup>33</sup>. To this end, we directly compared  
137 the within-group dispersion in several key brain structural phenotypes, including cortical  
138 thickness, as well as in cortical, subcortical and hippocampal subfield volumes, between 1151  
139 patients with SZ and 2010 healthy controls. Next, in order to test the whether between-subject  
140 variability is associated with the cumulative polygenic risk for SZ, we tested for associations  
141 between dispersion in the same brain features and PGR for SZ in 12,490 healthy individuals  
142 from the UK Biobank.

143

#### 144 **Material and methods**

145 *Samples:* Sample characteristics are presented in Table 1 and eMethods (Samples), and cohort  
146 details are presented in eTable 1.

147

#### 148 *Image preprocessing*

149 T1-images were processed using Freesurfer 5.3.0 (<http://surfer.nmr.mgh.harvard.edu>) for  
150 cortical reconstruction and volumetric segmentation<sup>34-37</sup> and Freesurfer 6.0 for hippocampus  
151 subfield segmentation<sup>38</sup>. Each participant's cortical thickness map was registered to the  
152 MNI305 fsaverage template and spatially smoothed (15 mm FWHM).

153

#### 154 *Genetic data*

155 PRS were calculated using PRSice<sup>39</sup> v1.25, based on the European-Caucasian subset of the  
156 2014 PGC2 schizophrenia GWAS<sup>22</sup>. The scores were calculated at a range of p-value



157 thresholds, from 0.001 to 0.5, with intervals of 0.001 (eMethods: Genetics). PRS based on a  
158 threshold of .05 were used for the main analysis since this threshold has been reported as  
159 optimal in terms of explaining case-control differences<sup>40</sup>, but we also performed follow-up  
160 analysis to test the robustness of findings to threshold selection.

161

### 162 *Statistical analysis*

163 Statistical analyses were performed in R (3.2.2; <https://www.r-project.org/>) and MATLAB  
164 (2014a, The MathWorks, Inc., Natick, Massachusetts, United States). For all included  
165 measures in the multi-scanner case-control sample we used vertex/volume-wise generalized  
166 additive models (GAM, R-Package: mgcv<sup>41</sup>) to regress out scanner effects while accounting  
167 for age, sex and diagnosis. We then modeled vertex/volume-wise mean and dispersion effects  
168 using double generalized linear models (DGLMs), which iteratively fits a GLM modeling the  
169 mean parameter, and a second GLM modeling the dispersion parameter (eMethods: DGLMs;  
170 R-package: dglm<sup>42</sup>). We then permuted the SZ and PRS column vector, respectively, and  
171 recalculated the mean and dispersion effects. For cortical thickness the true test statistics and  
172 the permuted statistical maps were then submitted to PALM<sup>43</sup> to correct for multiple  
173 comparisons using threshold-free cluster enhancement (TFCE) and tail approximation<sup>47</sup> (600  
174 permutations: eMethods: Permutation). Maps were thresholded at a significance level of  
175  $p < .05$ . For the cortical, subcortical, and hippocampal subfields volumes we performed 5000  
176 permutations per volume and extracted the maximum t-value across ROIs when computing p-  
177 values in order to correct for multiple comparisons. Significance threshold was set at  $p < .05$ .  
178 We also performed a meta-analysis of the multi-scanner thickness data (R-Package:  
179 metafor<sup>44</sup>) estimating case-control difference within each sample, and conducted analyses  
180 both with and without covarying for estimated intracranial volume (eTIV) for the volumetric  
181 measures. We performed follow-up analyses with more stringent exclusion criteria

182 (eMethods: Outliers). To assess the effect of PRS p-threshold selection, we performed a  
183 principal component analysis (R-package: prcomp, factoextra<sup>45</sup>) on PRS scores calculated  
184 across several thresholds (eMethods: PRS-PCA), and reran cortical thickness analysis on  
185 PCA-scores.

186

## 187 **Results**

188 *Vertex-wise thickness:* SZ was associated with decreased mean thickness globally, with the  
189 exception of the visual cortex, as well as globally increased thickness dispersion (Figure 1,  
190 panel A and B, Figure 2A; eFigure 2). Meta-analysis of within-sample effects with more  
191 stringent exclusion criteria revealed significantly increased heterogeneity in SZ, indicating  
192 that dispersion effects are not simply explained by multi-site variability or a few extreme  
193 values (eFigure 3). PRS was associated with lower mean thickness in the right inferior frontal  
194 gyrus, the right lateral orbitofrontal cortex, the right pre-central gyrus, the right medial  
195 temporal cortex, and bilaterally in middle and superior temporal cortices (Figure 1, panels C  
196 and D; eFigure 4). Converging results were obtained upon re-analysis with the addition of the  
197 first four population components added as covariates (eFigure 5A), or with more stringent  
198 exclusion criteria (eFigure 5B). Follow-up analysis using the first component from the PRS  
199 principal component analysis (PRS-PC1) gave close to an identical pattern as the PRS-model  
200 based on a threshold of .05 (eFigure 5C; vertex-wise  $r=.91$ ). There was no significant  
201 associations between polygenic risk and thickness dispersion, or between PRS-PC2 or PRS-  
202 PC3 and mean or dispersion of cortical thickness. Vertex-wise correlations between raw t-  
203 maps for SZ and polygenic risk were  $r=.2$  and  $r=.1$ , for the mean and dispersion respectively  
204 (eFigure 6).

205

206 *Cortical and subcortical volumes:* SZ was associated with lower mean cortical volume,  
207 supratentorial volume, total and subcortical gray volume, cerebellar cortical volume, as well  
208 as brain stem, hippocampus, amygdala, thalamus and nucleus accumbens, and several white  
209 matter volumes, as well as increased ventricle, caudate nucleus, pallidum and putamen  
210 volumes. SZ was further associated with increased dispersion in mean cortical volume, total  
211 gray volume, left hippocampus and ventricle volumes (Figure 2B, Figure 3). Models without  
212 eTIV (eFigure 7A) revealed no significant differences in the mean volumes of caudate  
213 nucleus and left putamen, and resulted in an additional significant association with dispersion  
214 in supratentorial volume. Reanalysis of mean and dispersion models with more stringent  
215 exclusion criteria showed converging results (eTable 2). PGR was not associated with mean  
216 or dispersion in any of the subcortical volumes (Figure 3B), this was also true for models  
217 without adjustment for eTIV (eFigure 7B).

218

219 *Hippocampal subfields:* Patients with SZ was associated with lower mean volume in both left  
220 and right whole hippocampus as well as in all hippocampal subfields, accompanied with  
221 larger right hippocampal fissures. There was increased dispersion in SZ in left whole  
222 hippocampus, as well as in left molecular layer, left granule cell layer of the dentate gyrus  
223 (GC-DG) and left CA4 (Figure 4A). Models without adjustment for eTIV gave the same  
224 results for mean volumes with the exception for left hippocampal fissure, which did not  
225 survive correction. Additional dispersion effects were observed for right whole hippocampus,  
226 and left CA1 (eFigure 8A). When reanalyzing SZ mean and dispersion models with more  
227 stringent exclusion criteria, we obtained similar results (eTable 3). PGR was associated with  
228 smaller left CA2/3. None of the subfields showed an association between volume dispersion  
229 and PRS (Figure 4B). Models without adjustment for eTIV revealed smaller left and right  
230 CA2/3, left granule cell layer of the dentate gyrus (GC-DG), and left CA4 (eFigure 8B) in

231 patients with SZ. Re-analysis with population covariates added to the models, re-analysis with  
232 stricter exclusion criteria, and modeling PRS using the first principal component, did not alter  
233 conclusions (eTable 4).

234

## 235 **Discussion**

236 In the current study we found that SZ is associated with increased brain heterogeneity in  
237 cortical thickness, as well as in cortical volumes, lateral and third ventricles and hippocampal  
238 volumes. The findings, based on harmonized analysis protocols for all included datasets, were  
239 robust to strict procedures for removing outliers, and follow-up meta-analysis confirmed that  
240 multi-site case-control difference cannot be explained by scanning site. These findings are  
241 largely in line with a recent meta-analytic study showing increased volumetric heterogeneity  
242 in the temporal lobe and lateral and third ventricles<sup>15</sup>. It also extends this meta-analysis by  
243 showing increased heterogeneity in cortical thickness as well as in specific hippocampal  
244 subfields. Further, increased polygenic risk in healthy individuals was associated with  
245 reductions in thickness in frontal and temporal regions, as well as in left dentate gyrus and  
246 CA4 and bilateral CA2/3, but not related to thickness dispersion.

247 We found widespread reductions in cortical thickness in SZ patients, with the  
248 characteristic pattern of stronger fronto-temporal effects, as well as global reductions in  
249 cortical volume<sup>46</sup>. In addition to these mean changes, we found that SZ is also associated with  
250 increased thickness heterogeneity compared to healthy controls. No cortical region showed  
251 the opposite pattern of increased homogeneity among patients. As with previous studies we  
252 found mean reductions in several brain volumes, with the most robust effects for cortical  
253 volume, cerebellum and hippocampus, as well as ventricle enlargement. These regions  
254 additionally showed increased heterogeneity in patients compared to controls, and again no  
255 region showed increased homogeneity, as might result if a particular region was similarly

256 affected by a common pathophysiological mechanism<sup>15</sup>. Instead, the results are in line with  
257 previous studies suggesting substantial neurobiological heterogeneity in SZ<sup>16</sup>. They do  
258 however contrast with a recent report<sup>15</sup> of increased volumetric homogeneity in SZ. One  
259 possible explanation is differing sample inclusion criteria, as the previous study included only  
260 first-episode psychosis patients. It is not unlikely that an earlier disease stage may offer a  
261 more direct window into core aspects of the pathophysiology which later shift towards  
262 increased inter-individual variability as patients vary across different illness stages and  
263 degrees of severity, as well as differences in treatment and medication status.

264 PRS reflect cumulative risk across multiple genetic loci, and SZ PRS is associated  
265 with several phenotypic traits, including liability for psychiatric disease such as bipolar  
266 disorder and schizoaffective disorder, negative symptoms, as well as IQ, working memory  
267 performance and brain activation<sup>25,47,48</sup>. SZ-PRS has been associated with cortical gyrification  
268 in healthy participants<sup>49</sup>, as well as reductions in global cortical thickness<sup>27</sup>. The current  
269 results show that higher SZ-PRS in healthy participants are associated with mean decrease in  
270 thickness in fronto-temporal cortices. Interestingly, these shifts in mean thickness were not  
271 associated with changes in brain heterogeneity, as was found for patients, pointing to  
272 differential effects of genetic risk on mean and heterogeneity changes. A recent study found  
273 that SZ environmental risk scores and SZ-PRS scores are both independently related to  
274 frontotemporal cortical thinning in patients, but not controls<sup>27</sup>. This underscores the  
275 importance of also investigating environmental risk factors, as well as gene-environment  
276 interplay, and their role in explaining the observed clinical and neurobiological heterogeneity

277 With regard to hippocampal volumes, we found that higher polygenic risk was  
278 associated with smaller volumes of the left CA2/3, in the absence of an effect on total  
279 hippocampal volume and after correcting for total intracranial volume, suggesting a specific  
280 effect of genetic risk on this region. The hippocampus has been hypothesized to play a

281 primary role in the pathophysiology of SZ, through progressive changes to its neural circuits  
282 as the disease evolves<sup>29</sup>. Our results also complement recent studies reporting that polygenic  
283 risk for SZ is predictive of hippocampal activation during memory encoding<sup>28</sup>, and of  
284 polygenic overlap between SZ and hippocampus volume<sup>50</sup>. Also, while the patients showed  
285 increased hippocampal heterogeneity, only mean effects were associated with PRS, mirroring  
286 the findings on cortical thickness. Thus, the dentate gyrus and CA2/3 emerge as key regions  
287 both for the manifestation of, and the genetic risk for, SZ and potentially informative for the  
288 classification of sub-types and degrees of severity.

289         Despite reliable associations between SZ and brain morphometry<sup>14</sup>, PRS is only  
290 weakly associated with subcortical volumes, however a recent study found polygenic overlap  
291 for SZ and hippocampal, putamen and intracranial volumes<sup>50</sup>. The lack of associations  
292 between PRS and subcortical volumes in the current study is in line with most previous  
293 reports on PRS<sup>30</sup>.

294

#### 295 *Limitations*

296 An important source of heterogeneity in the present case-control sample could be the large  
297 number of different scanning-sites included. However, in addition to residualizing for  
298 scanner-site in the main analysis, we also performed within-sample analysis and ran meta-  
299 analysis, which rule out scanner as a major contributor to the observed effects. Heterogeneity  
300 could be associated with differences in medication status and duration of illness. While we  
301 did find increased caudate and putamen volumes, indicative of medication effects<sup>51</sup>, these  
302 volumes did not show altered heterogeneity in SZ. Still, antipsychotic medication could  
303 possibly affect brain heterogeneity in other regions, in absence of a change in mean volume.  
304 Investigation of such effects requires carefully controlled settings, and is therefore difficult to  
305 address in large-scale multi-site studies. Another possible explanation is that the increased  
306 variability is caused by movement artefacts, which are typically greater in clinical

307 populations<sup>52</sup>, however running the analysis in a subset with stricter criteria for dataset  
308 exclusion did not alter the conclusions. One important consideration for case-control studies  
309 in general is the possibility that healthy controls are abnormally normal compared to the  
310 general healthy population due to selection bias and strict exclusion criteria<sup>53</sup>, underscoring  
311 the importance of studying the full range of phenotypic variability in the population. Further,  
312 the validity of choosing a given p-threshold selection among several possible thresholds when  
313 calculating PRS is uncertain. We addressed this by performing follow-up analysis where we  
314 performed PCA across PRS calculated across a wide range of thresholds, to derive a more  
315 general score of polygenic risk. This approach yielded results converging with the main  
316 analysis using a threshold of  $p < .05$ . The lack of association between SZ-PRS and brain  
317 heterogeneity suggest that the current SZ-PRS scores do not strongly reflect variance-  
318 controlling variants. As a composite score, SZ-PRS likely also hides a substantial genetic  
319 heterogeneity. A PRS-score calculated using a variance-controlling trait loci (vQTL)  
320 approach would likely be more sensitive in detecting such effects. Lastly, SZ is increasingly  
321 understood as a neurodevelopmental disorder<sup>54</sup> and disentangling the sources of heterogeneity  
322 in the adult patient population likely requires investigation of the life-span trajectories and  
323 aberrant developmental paths.

324

### 325 *Conclusion*

326 There are ongoing efforts to account for brain heterogeneity by means of delineating patient  
327 subtypes<sup>8,55</sup>, as well as characterizing patients by their differential degree of affectedness  
328 along one or multiple symptom-axes<sup>11,56</sup>. Here we report that SZ is associated with  
329 widespread and increased heterogeneity in cortical thickness, and cortical as well as  
330 hippocampal volume, beyond the known mean differences, compared controls. The results  
331 support to the notion that SZ is a highly heterogeneous disorder, and suggests that important  
332 information may be overlooked when only assessing mean differences. In healthy adults SZ-

333 PRS were associated with mean changes in brain areas implicated in SZ, but not associated  
334 with altered brain heterogeneity. Taken together, these findings warrant future longitudinal  
335 studies which can disentangle the genetic and environmental factors contributing to diverging  
336 trajectories and neurobiological heterogeneity, and in particular how these factors contribute  
337 to heterogeneity in fronto-temporal cortices and hippocampus.



338 **Collaborators**

339 Members of the Karolinska Schizophrenia Project (KaSP): Farde L<sup>1</sup>, Flyckt L<sup>1</sup>, Engberg  
340 G<sup>2</sup>, Erhardt S<sup>2</sup>, Fatouros-Bergman H<sup>1</sup>, Cervenka S<sup>1</sup>, Schwieler L<sup>2</sup>, Piehl F<sup>3</sup>, Agartz I<sup>1,4,5</sup>,  
341 Collste K<sup>1</sup>, Sellgren CM<sup>2</sup>, Victorsson P<sup>1</sup>, Malmqvist A<sup>2</sup>, Hedberg M<sup>2</sup>, Orhan F<sup>2</sup>

342 <sup>1</sup>Centre for Psychiatry Research, Department of Clinical Neuroscience, Karolinska

343 Institutet, & Stockholm County Council, Stockholm, Sweden; <sup>2</sup>Department of

344 Physiology and Pharmacology, Karolinska Institutet, Stockholm, Sweden;

345 <sup>3</sup>Neuroimmunology Unit, Department of Clinical Neuroscience, Karolinska Institutet,

346 Stockholm, Sweden; <sup>4</sup>NORMENT, KG Jebsen Centre for Psychosis Research, Division

347 of Mental Health and Addiction, University of Oslo, Oslo, Norway; <sup>5</sup>Department of

348 Psychiatry Research, Diakonhjemmet Hospital, Oslo, Norway.

349

350 **Acknowledgements**

351 The authors were funded by the Research Council of Norway (213837, 223273, 229129,

352 204966/F20, 249795, 251134), the South-Eastern Norway Regional Health Authority

353 (2014097, 2015073, 2016083, 2017112), KG Jebsen Stiftelsen, the European Commission 7th

354 Framework Programme (#602450, IMAGEMEND), the Swedish Research Council (2006-

355 2992, 2006-986, K2007-62X-15077-04-1, 2008-2167, 2008-7573, K2010-62X-15078-07-2,

356 K2012-61X-15078-09-3, 14266-01A,02-03, 2017-949), the regional agreement on medical

357 training and clinical research between Stockholm County Council, the Knut and Alice

358 Wallenbergs Foundation, the HUBIN project, the German Research Foundation DFG (KI

359 576/14-2, ZI1253/3-1, ZI1253/3-2), Fondazione Con Il Sud and the Hoffmann-La Roche

360 Collaboration. This research has been conducted using the UK Biobank Resource (access

361 code 27412).

362 This study includes data from several sources. A detailed overview over included cohorts and  
363 acknowledgements of their respective funding sources is provided in eTable 1. None of the  
364 funding sources played a role in analysis and interpretation of the data; preparation, review, or  
365 approval of the manuscript; or decision to submit the manuscript for publication.

366

#### 367 **Author contribution statement**

368 D.A. and L.T.W conceived of the study; D.A. performed the analysis with contributions from  
369 L.T.W., T.K and D.M; A.C.P., T.M., J.R., F.B., I.A., D.M.B., A.B., C.L.B., S.C., S.D.,  
370 N.T.D., S.E., H.F.B., L.F., A.D.G., B.H., E.G.J., P.K., M.J.L., A.M.L., G.P., E.S.,  
371 O.B.S., T.Q., M.Z., and O.A.A contributed with data preprocessing, quality assurance and  
372 interpretation of results. D.A., T.K. and L.T.W. wrote the first draft of the paper, and all  
373 authors contributed to the final manuscript. D.A. and L.T.W. had full access to all the data in  
374 the study and takes responsibility for the integrity of the data and the accuracy of the data  
375 analysis.

376

#### 377 **Disclosures**

378 A. B is a stockholder of Hoffmann-La Roche Ltd. He has also received consulting fees from  
379 Biogen and lecture fees from Otsuka, Janssen, Lundbeck. M. Z has received speaker and  
380 travel grants from Otsuka, Servier, Lundbeck, Roche, Ferrer and Trommsdorff.

381

## 382 **References**

- 383 1. WHO. The Global Burden of Disease: 2004 Update. In: WHO Press (2008).
- 384 2. Lakhan SE, Vieira KF. Schizophrenia pathophysiology: are we any closer to a complete  
385 model? *Annals of General Psychiatry*. 2009;8(1):12.
- 386 3. Owen MJ, Sawa A, Mortensen PB. Schizophrenia. *The Lancet*. 2016;388(10039):86-97.
- 387 4. Van Rheenen TE, Lewandowski KE, Tan EJ, et al. Characterizing cognitive heterogeneity on  
388 the schizophrenia–bipolar disorder spectrum. *Psychological Medicine*. 2017;47(10):1848-  
389 1864.
- 390 5. Malhotra AK. Dissecting the Heterogeneity of Treatment Response in First-Episode  
391 Schizophrenia. *Schizophrenia Bulletin*. 2015;41(6):1224-1226.
- 392 6. Huber G. The heterogeneous course of schizophrenia. *Schizophrenia Research*.  
393 1997;28(2):177-185.
- 394 7. Weinberg D, Lenroot R, Jacomb I, et al. Cognitive subtypes of schizophrenia characterized by  
395 differential brain volumetric reductions and cognitive decline. *JAMA Psychiatry*.  
396 2016;73(12):1251-1259.
- 397 8. Zhang T, Koutsouleris N, Meisenzahl E, Davatzikos C. Heterogeneity of Structural Brain  
398 Changes in Subtypes of Schizophrenia Revealed Using Magnetic Resonance Imaging Pattern  
399 Analysis. *Schizophrenia Bulletin*. 2015;41(1):74-84.
- 400 9. Sugihara G, Oishi N, Son S, Kubota M, Takahashi H, Murai T. Distinct Patterns of Cerebral  
401 Cortical Thinning in Schizophrenia: A Neuroimaging Data-Driven Approach. *Schizophrenia*  
402 *Bulletin*. 2017;43(4):900-906.
- 403 10. Seaton BE, Goldstein G, Allen DN. Sources of Heterogeneity in Schizophrenia: The Role of  
404 Neuropsychological Functioning. *Neuropsychology review*. 2001;11(1):45-67.
- 405 11. Koutsouleris N, Gaser C, Jäger M, et al. Structural correlates of psychopathological symptom  
406 dimensions in schizophrenia: A voxel-based morphometric study. *NeuroImage*.  
407 2008;39(4):1600-1612.
- 408 12. van Erp TGM, Walton E, Hibar DP, et al. Cortical brain abnormalities in 4474 individuals  
409 with schizophrenia and 5098 controls via the ENIGMA consortium. *Biological Psychiatry*.  
410 2018.
- 411 13. Moberget T, Doan NT, Alnæs D, et al. Cerebellar volume and cerebellocerebral structural  
412 covariance in schizophrenia: a multisite mega-analysis of 983 patients and 1349 healthy  
413 controls. *Molecular psychiatry*. 2017.
- 414 14. van Erp TGM, Hibar DP, Rasmussen JM, et al. Subcortical brain volume abnormalities in  
415 2028 individuals with schizophrenia and 2540 healthy controls via the ENIGMA consortium.  
416 *Molecular psychiatry*. 2015;21:547.

- 417 15. Brugger SP, Howes OD. Heterogeneity and homogeneity of regional brain structure in  
418 schizophrenia: A meta-analysis. *JAMA Psychiatry*. 2017;74(11):1104-1111.
- 419 16. Wolfers T, Doan NT, Kaufmann T, et al. Extensive interindividual differences in  
420 schizophrenia and bipolar disorder: mapping biological heterogeneity in reference to  
421 normative brain ageing. *JAMA psychiatry*. in press.
- 422 17. Wolfers T, Buitelaar JK, Beckmann CF, Franke B, Marquand AF. From estimating activation  
423 locality to predicting disorder: A review of pattern recognition for neuroimaging-based  
424 psychiatric diagnostics. *Neuroscience and biobehavioral reviews*. 2015;57:328-349.
- 425 18. Doan NT, Kaufmann T, Bettella F, et al. Distinct multivariate brain morphological patterns  
426 and their added predictive value with cognitive and polygenic risk scores in mental disorders.  
427 *NeuroImage: Clinical*. 2017;15:719-731.
- 428 19. Gopal S, Miller RL, Michael A, et al. Spatial Variance in Resting fMRI Networks of  
429 Schizophrenia Patients: An Independent Vector Analysis. *Schizophrenia Bulletin*.  
430 2016;42(1):152-160.
- 431 20. Gopal S, Miller RL, Baum SA, Calhoun VD. Approaches to Capture Variance Differences in  
432 Rest fMRI Networks in the Spatial Geometric Features: Application to Schizophrenia.  
433 *Frontiers in neuroscience*. 2016;10:85.
- 434 21. Sullivan PF, Kendler KS, Neale MC. Schizophrenia as a complex trait: Evidence from a meta-  
435 analysis of twin studies. *Archives of General Psychiatry*. 2003;60(12):1187-1192.
- 436 22. Schizophrenia Working Group of the Psychiatric Genomics C. Biological insights from 108  
437 schizophrenia-associated genetic loci. *Nature*. 2014;511(7510):421-427.
- 438 23. The International Schizophrenia C. Common polygenic variation contributes to risk of  
439 schizophrenia and bipolar disorder. *Nature*. 2009;460:748.
- 440 24. Jones HJ, Stergiakouli E, Tansey KE, et al. Phenotypic manifestation of genetic risk for  
441 schizophrenia during adolescence in the general population. *JAMA Psychiatry*.  
442 2016;73(3):221-228.
- 443 25. Kauppi K, Westlye LT, Tesli M, et al. Polygenic Risk for Schizophrenia Associated With  
444 Working Memory-related Prefrontal Brain Activation in Patients With Schizophrenia and  
445 Healthy Controls. *Schizophrenia Bulletin*. 2015;41(3):736-743.
- 446 26. Walton E, Geisler D, Lee PH, et al. Prefrontal Inefficiency Is Associated With Polygenic Risk  
447 for Schizophrenia. *Schizophrenia Bulletin*. 2014;40(6):1263-1271.
- 448 27. Neilson E, Bois C, Gibson J, et al. Effects of environmental risks and polygenic loading for  
449 schizophrenia on cortical thickness. *Schizophrenia Research*. 2017;184:128-136.
- 450 28. Chen Q, Ursini G, Romer AL, et al. Schizophrenia polygenic risk score predicts mnemonic  
451 hippocampal activity. *Brain : a journal of neurology*. 2018;141(4):1218-1228.

- 452 29. Lieberman JA, Girgis RR, Brucato G, et al. Hippocampal dysfunction in the pathophysiology  
453 of schizophrenia: a selective review and hypothesis for early detection and intervention.  
454 *Molecular psychiatry*. 2018.
- 455 30. Reddaway JT, Doherty JL, Lancaster T, Linden D, Walters JT, Hall J. Genomic and Imaging  
456 Biomarkers in Schizophrenia. In: *Current Topics in Behavioral Neurosciences*. Berlin,  
457 Heidelberg: Springer Berlin Heidelberg; 2018:1-28.
- 458 31. Fraser HB, Schadt EE. The Quantitative Genetics of Phenotypic Robustness. *PloS one*.  
459 2010;5(1):e8635.
- 460 32. Dwyer DB, Cabral C, Kambeitz-Illankovic L, et al. Brain Subtyping Enhances The  
461 Neuroanatomical Discrimination of Schizophrenia. *Schizophrenia Bulletin*. 2018:sby008-  
462 sby008.
- 463 33. Conley D, Johnson R, Domingue B, Dawes C, Boardman J, Siegal M. A sibling method for  
464 identifying vQTLs. *PloS one*. 2018;13(4):e0194541.
- 465 34. Fischl B. FreeSurfer. *Neuroimage*. 2012;62(2):774-781.
- 466 35. Fischl B, Salat DH, Busa E, et al. Whole brain segmentation: automated labeling of  
467 neuroanatomical structures in the human brain. *Neuron*. 2002;33(3):341-355.
- 468 36. Dale AM, Fischl B, Sereno MI. Cortical surface-based analysis. I. Segmentation and surface  
469 reconstruction. *Neuroimage*. 1999;9(2):179-194.
- 470 37. Fischl B, Sereno MI, Dale AM. Cortical surface-based analysis. II: Inflation, flattening, and a  
471 surface-based coordinate system. *Neuroimage*. 1999;9(2):195-207.
- 472 38. Iglesias JE, Augustinack JC, Nguyen K, et al. A computational atlas of the hippocampal  
473 formation using ex vivo, ultra-high resolution MRI: Application to adaptive segmentation of  
474 in vivo MRI. (1095-9572 (Electronic)).
- 475 39. Euesden J, Lewis CM, O'Reilly PF. PRSice: Polygenic Risk Score software. *Bioinformatics*.  
476 2015;31(9):1466-1468.
- 477 40. Schizophrenia Working Group of the Psychiatric Genomics C. Biological insights from 108  
478 schizophrenia-associated genetic loci. *Nature*. 2014;511:421.
- 479 41. Wood S. mgcv: Mixed GAM Computation Vehicle with Automatic Smoothness Estimation (v  
480 1.8-23). <https://CRAN.R-project.org/package=mgcv>. 2018.
- 481 42. Dunn PK, Smyth GK. dglm: Double Generalized Linear Models (v. 1.8.3). [https://CRAN.R-](https://CRAN.R-project.org/package=dglm)  
482 [project.org/package=dglm](https://CRAN.R-project.org/package=dglm). 2016.
- 483 43. Winkler AM, Ridgway GR, Webster MA, Smith SM, Nichols TE. Permutation inference for  
484 the general linear model. *NeuroImage*. 2014;92:381-397.
- 485 44. Viechtbauer W. Conducting meta-analyses in R with the metafor. *Journal of Statistical*  
486 *Software*. 2010;36(3): <http://www.jstatsoft.org/v36/i03/>.
- 487 45. Kassambara A, Mundt F. factoextra: Extract and Visualize the Results of Multivariate Data  
488 Analyses. R package (v. 1.0.5) <https://CRAN.R-project.org/package=factoextra>. 2017.

- 489 46. van Erp TGM, Walton E, Hibar DP, et al. Cortical Brain Abnormalities in 4474 Individuals  
490 With Schizophrenia and 5098 Control Subjects via the Enhancing Neuro Imaging Genetics  
491 Through Meta Analysis (ENIGMA) Consortium. *Biological Psychiatry*. 2018.
- 492 47. Mistry S, Harrison JR, Smith DJ, Escott-Price V, Zammit S. The use of polygenic risk scores  
493 to identify phenotypes associated with genetic risk of schizophrenia: Systematic review.  
494 *Schizophrenia Research*. 2018;197:2-8.
- 495 48. Tesli M, Espeseth T, Bettella F, et al. Polygenic risk score and the psychosis continuum  
496 model. *Acta Psychiatrica Scandinavica*. 2014;130(4):311-317.
- 497 49. Liu B, Zhang X, Cui Y, et al. Polygenic Risk for Schizophrenia Influences Cortical  
498 Gyrfication in 2 Independent General Populations. *Schizophrenia Bulletin*. 2017;43(3):673-  
499 680.
- 500 50. Smeland OB, Wang Y, Frei O, et al. Genetic Overlap Between Schizophrenia and Volumes of  
501 Hippocampus, Putamen, and Intracranial Volume Indicates Shared Molecular Genetic  
502 Mechanisms. *Schizophrenia Bulletin*. 2018;44(4):854-864.
- 503 51. Jørgensen KN, Nesvåg R, Gunleiksrud S, Raballo A, Jönsson EG, Agartz I. First- and second-  
504 generation antipsychotic drug treatment and subcortical brain morphology in schizophrenia.  
505 *European Archives of Psychiatry and Clinical Neuroscience*. 2016;266(5):451-460.
- 506 52. Reuter M, Tisdall MD, Qureshi A, Buckner RL, van der Kouwe AJW, Fischl B. Head motion  
507 during MRI acquisition reduces gray matter volume and thickness estimates. *NeuroImage*.  
508 2015;107:107-115.
- 509 53. Schwartz S, Susser E. The use of well controls: an unhealthy practice in psychiatric research.  
510 *Psychological Medicine*. 2011;41(6):1127-1131.
- 511 54. Insel TR. Rethinking schizophrenia. *Nature*. 2010;468(7321):187-193.
- 512 55. Honnorat N, Dong A, Meisenzahl-Lechner E, Koutsouleris N, Davatzikos C. Neuroanatomical  
513 heterogeneity of schizophrenia revealed by semi-supervised machine learning methods.  
514 *Schizophrenia Research*. 2017.
- 515 56. Viher PV, Stegmayer K, Giezendanner S, et al. Cerebral white matter structure is associated  
516 with DSM-5 schizophrenia symptom dimensions. *NeuroImage: Clinical*. 2016;12:93-99.

517

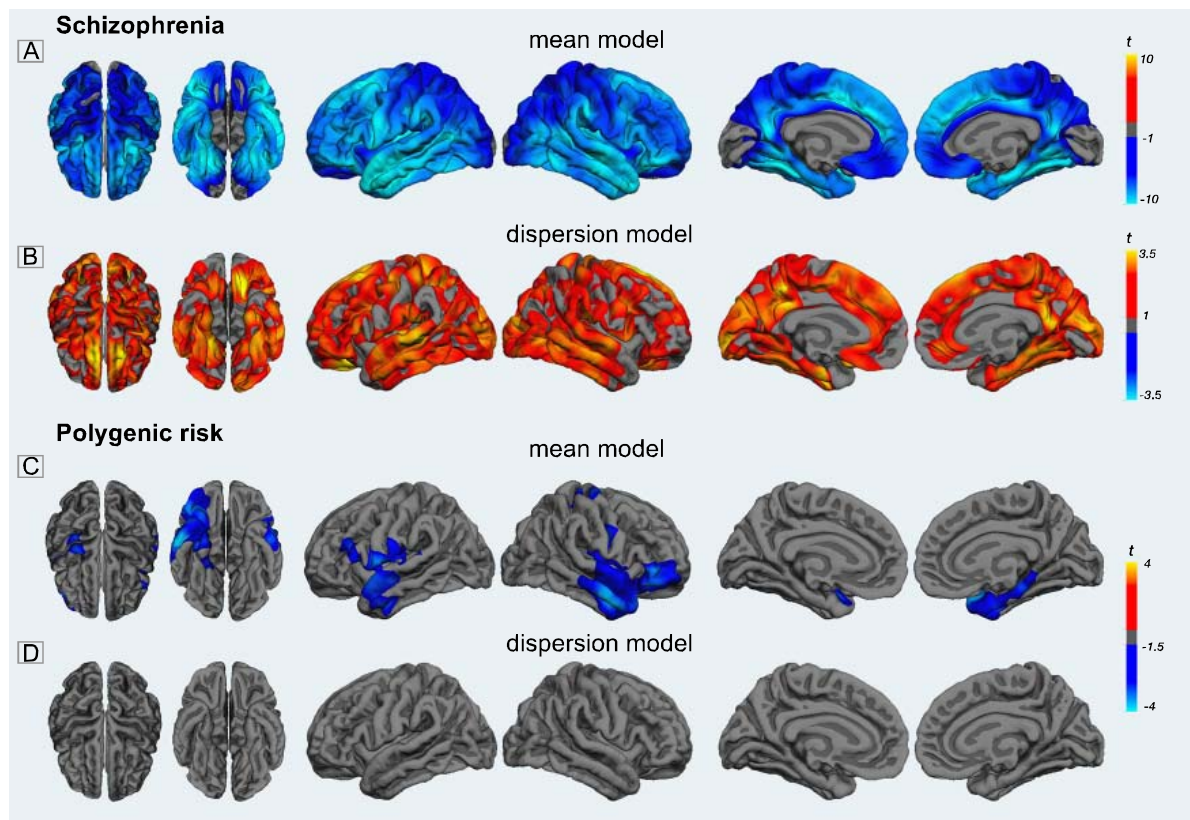

518

519 **Figure 1. Mean and dispersion of cortical thickness.** All maps were thresholded using  
520 permutation testing, threshold free cluster enhancement, and fitting the tail of the permutation  
521 distribution to a generalized Pareto distribution (500 permutations,  $p < .05$ , FWE). **A:** t-map  
522 for the SZ mean model; cold colors represent areas with decreased mean thickness in SZ  
523 compared to healthy controls. SZ was associated with decreased thickness globally, with the  
524 exception of the visual cortex, and with strongest effects in frontal and temporal regions,  
525 compared to healthy controls. **B:** t-map for the SZ dispersion model. Warm colors represent  
526 areas with increased heterogeneity in SZ compared to healthy controls. Inter-individual  
527 variability in cortical thickness showed a spatially global increase for the SZ-group compared  
528 to healthy controls. **C:** In an independent sample of healthy adults, the mean model showed  
529 that higher polygenic risk for SZ was associated with lower cortical thickness, represented by  
530 cold colors, in frontal and parietal cortices. **D:** Polygenic risk was not associated with cortical  
531 thickness heterogeneity in any region.

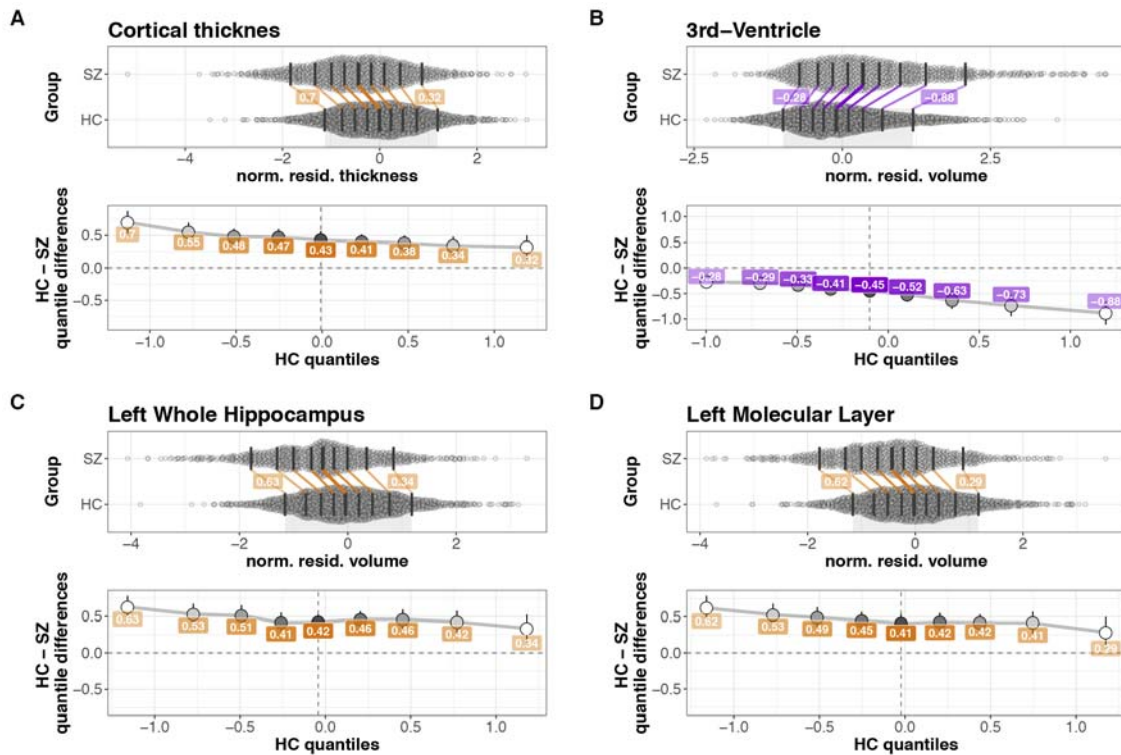

532

533 **Figure 2. Shift function plots.** The top panels show jittered marginal distribution scatterplots for  
 534 variance model associations, with overlaid shift function plots using deciles. 95% confidence intervals  
 535 were computed using a percentile estimation of the standard error of the difference between quantiles  
 536 on 1000 bootstrap samples. The bottom panels show linked deciles from shift functions in top panels.  
 537 **A:** Cortical thickness, vertex values were extracted by masking the images by the SZ-dispersion  
 538 significance map, and averaged across vertices and hemispheres. Residualized for scanner, sex and  
 539 age. SZ is associated with reduced thickness, with larger differences between groups in the lower  
 540 deciles. **B:** 3rd ventricle volume, residualized for scanner, sex and age and eTIV. SZ is associated with  
 541 larger volumes compared to controls, with the largest difference between groups in the upper deciles.  
 542 **C-D:** Left whole hippocampus, and left molecular layer (hippocampal subfield), values residualized  
 543 for scanner, sex and age and eTIV. SZ is associated with larger volumes compared to controls, with  
 544 the largest difference between groups in the upper deciles.

545

546



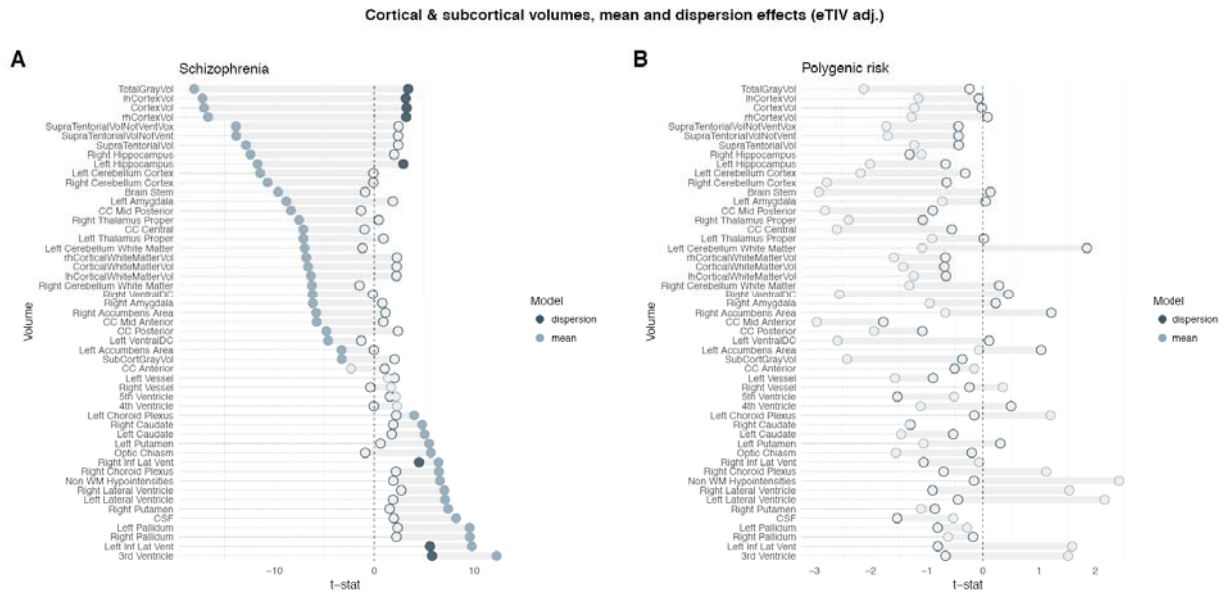

547

548 **Figure 3. Mean and dispersion of cortical and subcortical volumes. t-statistic for both**

549 mean (outline in light blue) and dispersion (outline in dark blue), filled blue dots mark

550 significant effects after correction for multiple comparisons across regions (5000

551 permutations, permuted  $p < .05$ , FWE, eTIV-adjusted). **A:** The SZ-group had both decreased

552 cortical and subcortical volumes, as well as increased ventricles and putamen and pallidum

553 volumes. Cortical, hippocampal and ventricle volume were more heterogeneous in the SZ-

554 group compared to healthy controls. **B:** Polygenic risk for SZ was not associated with mean

555 changes nor dispersion in any of the regions.

556

557

558

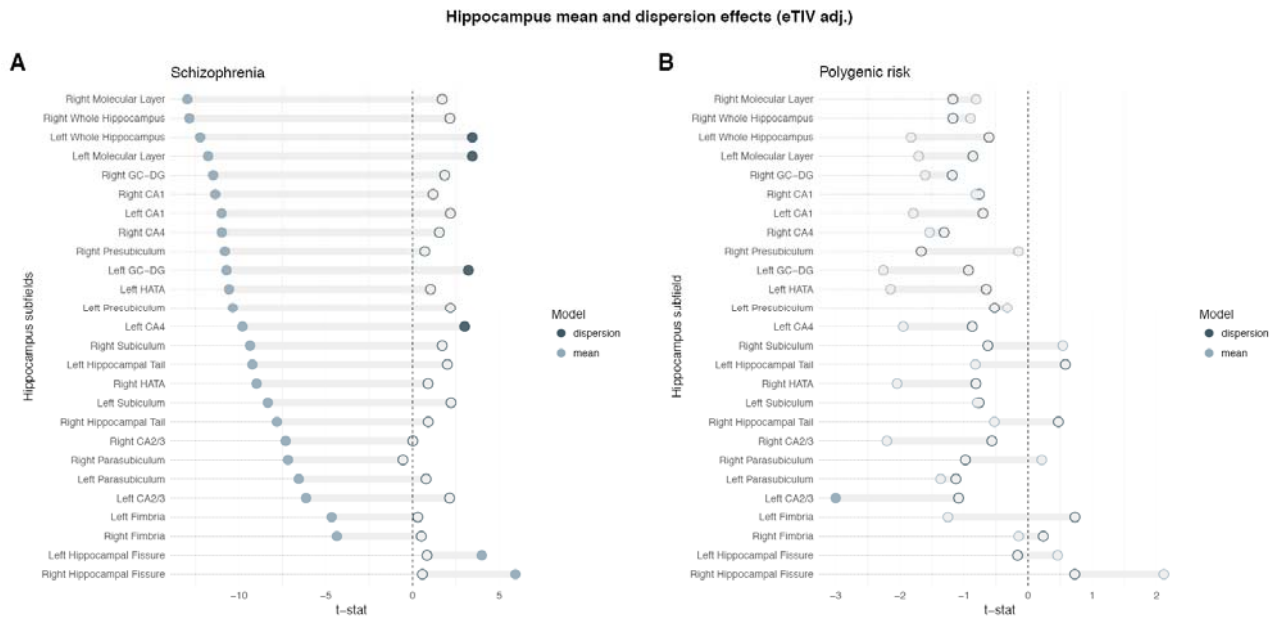

559

560 **Figure 4. Mean and dispersion of hippocampus subfields volumes.** t-statistic for both  
561 mean (outline in light blue) and dispersion (outline in dark blue), filled blue dots mark  
562 significant effects after correction for multiple comparisons across regions (5000  
563 permutations, permuted  $p < .05$ , FWE, eTIV-adjusted). **A:** The SZ-group had decreased  
564 hippocampal volumes, and this decrease was also evident in all subfields, and accompanied  
565 with an increase of the hippocampal fissures. Hippocampal volumes were also more  
566 heterogeneous in the SZ-group, and among the subfields this effect was present in the left  
567 molecular layer, bilateral CA1, right dentate gyrus and left CA4. **B:** Polygenic risk for SZ was  
568 associated with mean reductions of left dentate gyrus, left CA4 and bilateral CA2/3. Neither  
569 total hippocampal volumes nor any of the subfields showed a significant association between  
570 polygenic risk and volume heterogeneity.

571

572

| Case-control samples |             |             |             |             |             |             |             |             |
|----------------------|-------------|-------------|-------------|-------------|-------------|-------------|-------------|-------------|
| Sample               | HC          |             |             |             | SZ          |             |             |             |
|                      | n           | mean age    | std         | females (n) | n           | mean age    | std         | females (n) |
| BrainGluSchi         | 47          | 33,7        | 12,7        | 18          | 37          | 37,2        | 15,3        | 3           |
| CIMH                 | 43          | 30,6        | 11,5        | 14          | 53          | 31,2        | 8,6         | 17          |
| CNP-1                | 102         | 31,7        | 8,9         | 47          | 25          | 36,9        | 9,3         | 8           |
| CPN-1                | 23          | 30,7        | 8,6         | 12          | 25          | 36,0        | 8,6         | 4           |
| COBRE                | 90          | 38,1        | 11,7        | 26          | 88          | 38,1        | 13,7        | 18          |
| HUBIN                | 102         | 42,0        | 8,8         | 33          | 94          | 41,7        | 7,6         | 24          |
| KaSP                 | 45          | 25,7        | 5,2         | 21          | 37          | 28,5        | 7,5         | 12          |
| MCC-1                | 43          | 29,0        | 11,3        | 9           | 35          | 32,6        | 12,4        | 7           |
| MCC-2                | 26          | 33,1        | 12,4        | 11          | 32          | 32,4        | 10,3        | 8           |
| MCC-3                | 24          | 40,8        | 9,4         | 9           | 33          | 38,3        | 10,0        | 8           |
| NUNA                 | 44          | 31,3        | 8,5         | 22          | 44          | 33,0        | 6,8         | 14          |
| NUSDAST              | 95          | 33,8        | 14,5        | 44          | 114         | 35,0        | 13,1        | 38          |
| TOP-3T-1             | 294         | 31,8        | 7,6         | 121         | 112         | 28,0        | 8,1         | 38          |
| TOP-3T-2             | 301         | 35,8        | 10,1        | 141         | 110         | 33,0        | 9,9         | 44          |
| TOP-1.5              | 295         | 35,5        | 9,6         | 131         | 225         | 31,9        | 9,1         | 96          |
| UNIBA                | 436         | 26,7        | 7,7         | 225         | 87          | 34,1        | 7,6         | 22          |
| <b>Total</b>         | <b>2010</b> | <b>32,7</b> | <b>10,4</b> | <b>884</b>  | <b>1151</b> | <b>33,8</b> | <b>10,6</b> | <b>361</b>  |
| PRS sample           |             |             |             |             |             |             |             |             |
| Sample               | n           | mean age    | std         | females (n) |             |             |             |             |
| UKB                  | 12490       | 55,9        | 7,5         | 6465        |             |             |             |             |

573

574

**Table 1. Sample characteristics.** We included data from 16 samples for the case-control

575

analysis, each sample contained MR-scans from both patients with SZ and healthy control

576

participants. -analysis was performed on UKB participants, excluding those with a diagnosed

577

neurological or mental disorder. More detailed information about samples and

578

acknowledgements are provided in eTable 1.

### Polygenic risk, principal component analysis

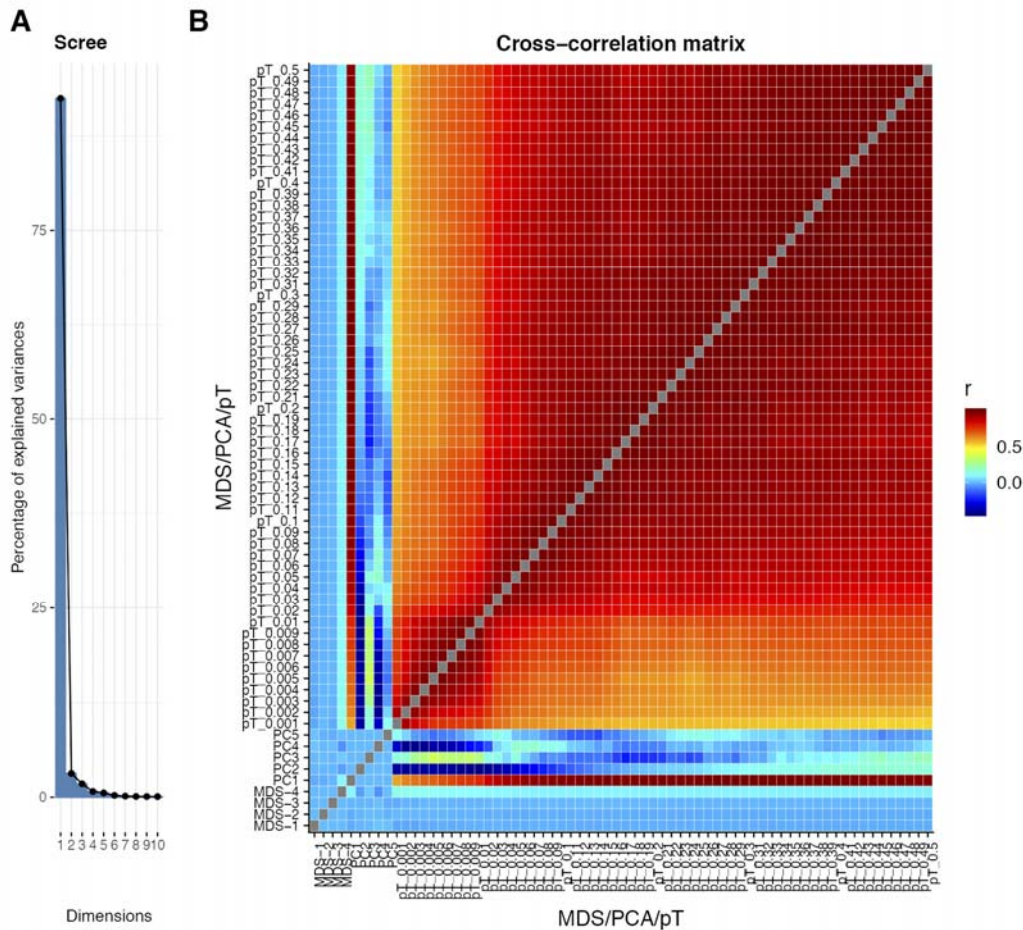

579

580 **eFigure 1: Principal component analysis on PRS scores calculated at different p-**  
581 **thresholds.** We performed PCA on PRS scores from the UK Biobank sample (n=12490),  
582 calculated from a threshold of  $p < .001$ , to  $p < .5$  (500 thresholds, step of .001). **A:** Scree plot  
583 showing explained variance for the first 10 components. **B:** Cross-correlation matrix of first  
584 four MDS components, first five principal components, and PRS for thresholds from .001 to  
585 .5 (steps of .001 up to  $p < .01$ , then steps of .01). The first three principal components  
586 explained 92.5%, 3.1% and 1.8% of the variance, respectively. The first components showed  
587 high correlation with PRS across all thresholds, but relatively lower for the stricter compared  
588 to the more lenient p-thresholds. Component 2 correlated negatively with PRS from the  
589 stricter p-thresholds, and positive with more lenient p-thresholds. Component 3 was positively

590 correlated with scores calculated with the strictest and most lenient p-thresholds, while

591 correlating negatively with PRS based on the intermediate p-thresholds.

592

593

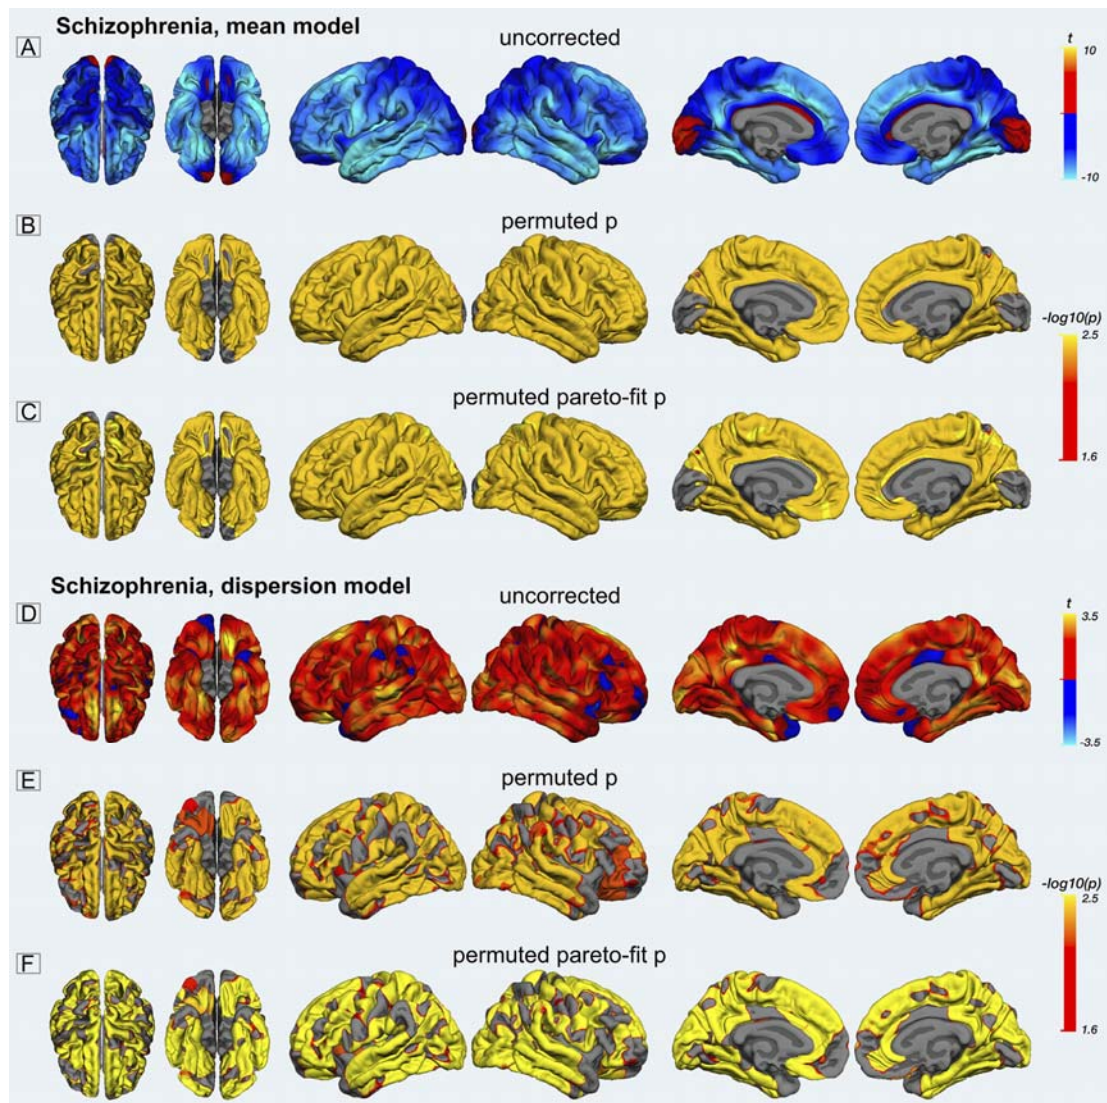

594

595 **eFigure 2: SZ Vertex-wise mean and dispersion models. A:** unthresholded t-map for the

596 SZ mean model; warm/cold colors represent areas with increased and decreased mean

597 thickness in SZ compared to healthy controls. **B:**  $-\log_{10}(p)$  map for the SZ-mean model.

598 Thresholded at  $-\log(p) > 1.6$  ( $p < .05$ , two tailed, FWE). Derived by comparing the vertex-

599 wise values of the actual TFCE-map for the SZ mean-model with TFCE-maps derived from

600 500 random permutations of the diagnosis labels. **C:**  $-\log_{10}(p)$  map derived from fitting a  
601 generalized Pareto distribution to the tail of the permutation distribution. **D:** unthresholded t-  
602 map for the SZ dispersion model; warm/cold colors represent areas with increased and  
603 decreased thickness dispersion in SZ compared to healthy controls. **E:**  $-\log_{10}(p)$  map for the  
604 SZ-dispersion model. Thresholded at  $-\log(p) > 1.6$  ( $p < .05$ , two tailed, FWE). Derived by  
605 comparing the vertex-wise values of the actual TFCE-map for the SZ dispersion-model with  
606 TFCE-maps derived from 500 random permutations of the diagnosis labels. **F:**  $-\log_{10}(p)$  map  
607 derived from fitting a generalized Pareto distribution to the tail of the permutation  
608 distribution.  
609

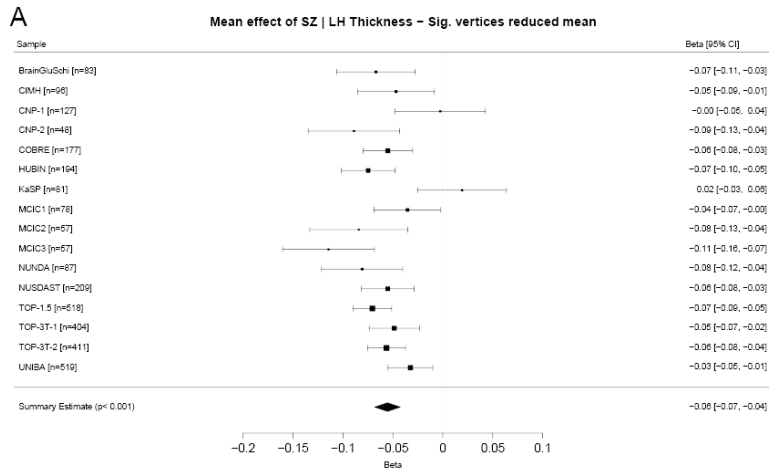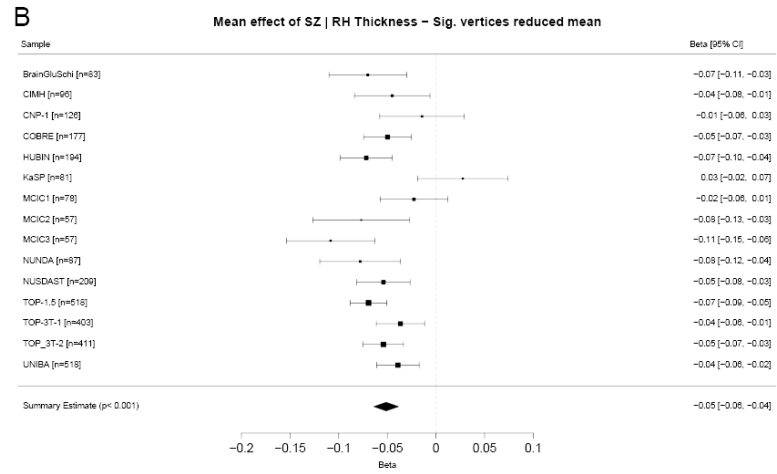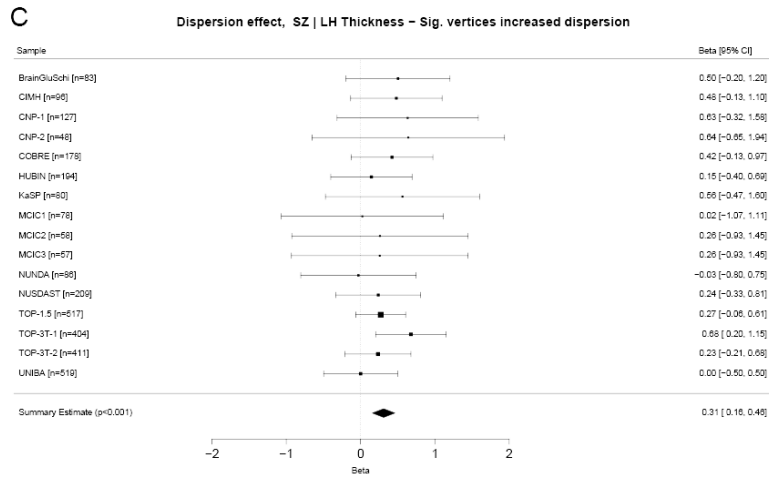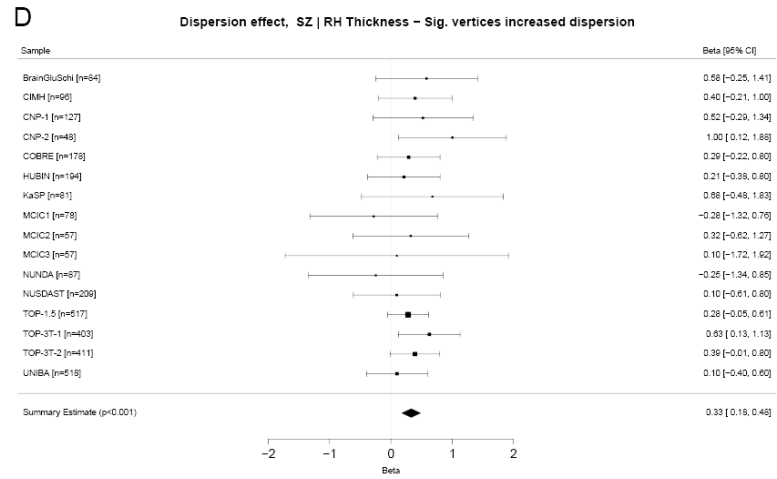

612 **eFigure 3: Meta-analysis of SZ mean and dispersion effects with stricter inclusion criteria.** The above panel shows the within-sample  
613 effects of the mean-model in the vertices showing a significant group-level effect for the left and the right cortical hemisphere. The bottom panel  
614 displays the dispersion effects. Both hemispheres showed a significant meta-analytic thickness decrease, as well as a dispersion increase,  
615 suggesting that the results from the main analysis are not driven by site-related variance not accounted for in the multi-site regression models.  
616 The analysis also included removal of subjects with either eTIV or mean thickness-values at  $|z| > 3$ , or significant outlier test (corrected  $p < .05$ ).  
617 For CNP-2, right hemisphere, the DGLM did not converge.  
618



619

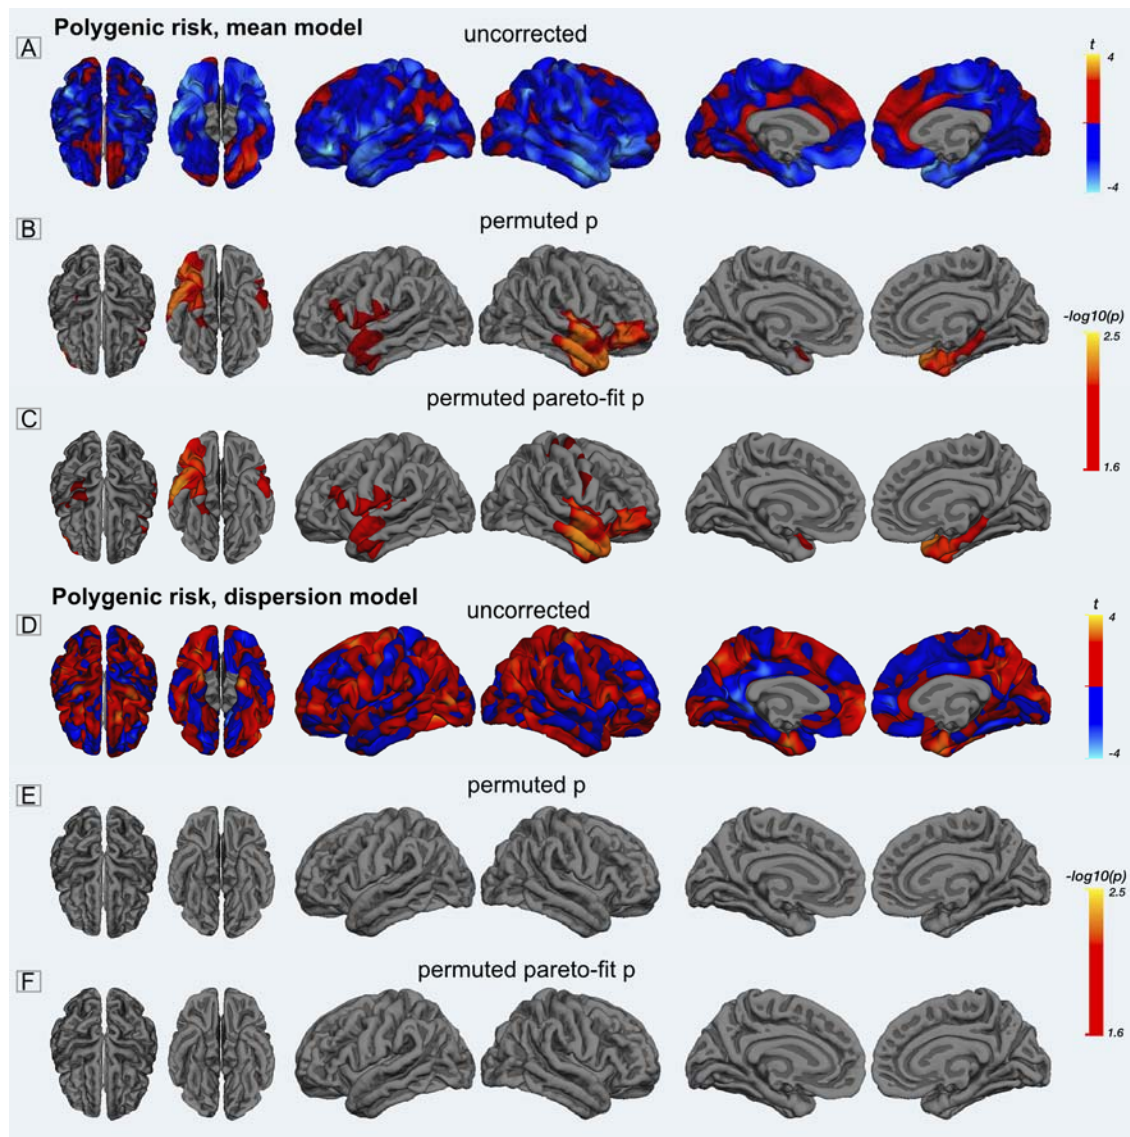

620

621 **eFigure 4: Polygenic risk, vertex-wise mean and dispersion models. A:** unthresholded t-  
622 map for the PRS mean model; warm/cold colors represent areas with increased and decreased  
623 mean thickness with increased PRS. **B:**  $-\log_{10}(p)$  map for the PRS-mean model. Thresholded  
624 at  $-\log(p) > 1.6$  ( $p < .05$ , two tailed, FWE). Derived by comparing the vertex-wise values of  
625 the actual TFCE-map for the PRS mean-model with TFCE-maps derived from 500 random  
626 permutations of the PRS scores. **C:**  $-\log_{10}(p)$  map derived from fitting a generalized Pareto  
627 distribution to the tail of the permutation distribution. **D:** unthresholded t-map for the PRS

628 dispersion model; warm/cold colors represent areas with increased and decreased thickness  
629 dispersion with increased PRS. **E:**  $-\log_{10}(p)$  map for the PRS-dispersion model. Thresholded  
630 at  $-\log(p) > 1.6$  ( $p < .05$ , two tailed, FWE). Derived by comparing the vertex-wise values of  
631 the actual TFCE-map for the SZ dispersion-model with TFCE-maps derived from 500 random  
632 permutations of the PRS scores. **F:**  $-\log_{10}(p)$  map derived from fitting a generalized Pareto  
633 distribution to the tail of the permutation distribution.  
634  
635

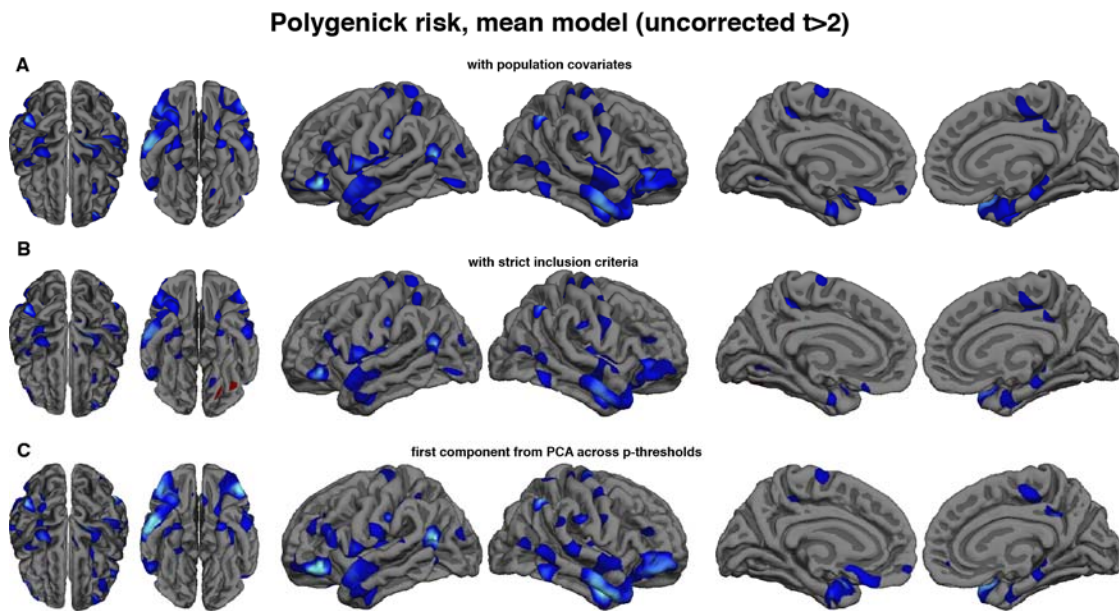

636  
637 **Figure 5: Reanalysis of polygenic risk score models on cortical thickness.** To test the  
638 robustness of the mean effect of PRS on cortical thickness, we performed several follow-up  
639 analysis: **A:** Uncorrected t-map for PRS-scores, including the four first population covariates  
640 derived from multidimensional scaling (MDS) analysis. **B:** Uncorrected t-map for reanalysis  
641 with extreme scoring individuals removed (mean thickness or eTIV,  $|z| > 3$ , or outlier test  
642 significant at  $p < .05$ , FWE). **C:** Uncorrected t-map for the analysis using the first principal  
643 component from the PCA on PRS scores calculated across a wide range of p-thresholds.  
644

## Vertex-correlations - Schizophrenia and polygenic risk

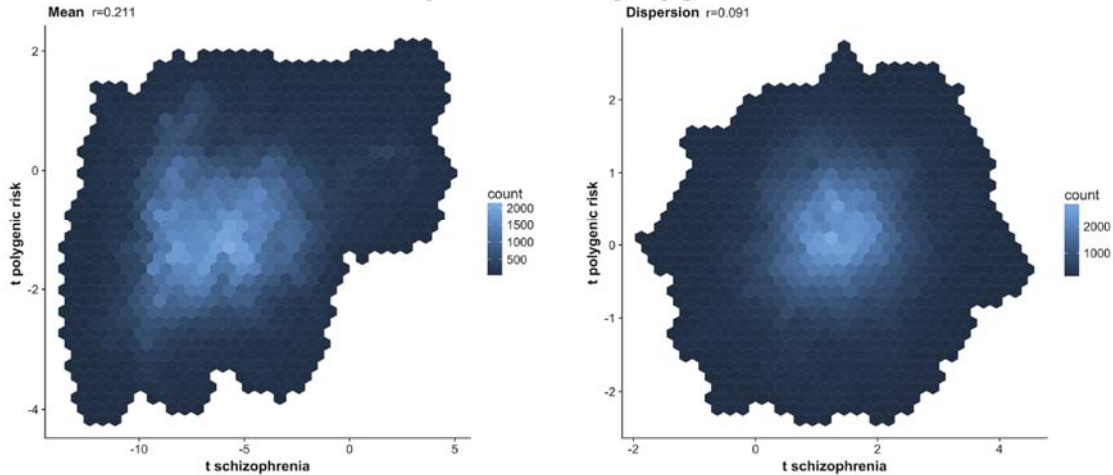

645

646 **eFigure 6: Spatial overlap between SZ and PRS.** The vertex-wise t-values for the SZ-  
 647 models are shown on the x-axis and the vertex-wise t-values for the PRS-models on the Y-  
 648 axis. The left plot shows the mean-model (vertex-wise correlation of .2) and the right plot  
 649 shows the dispersion models (vertex-wise correlation of .1). The heatmaps represent the count  
 650 of vertices at a value.

651

652

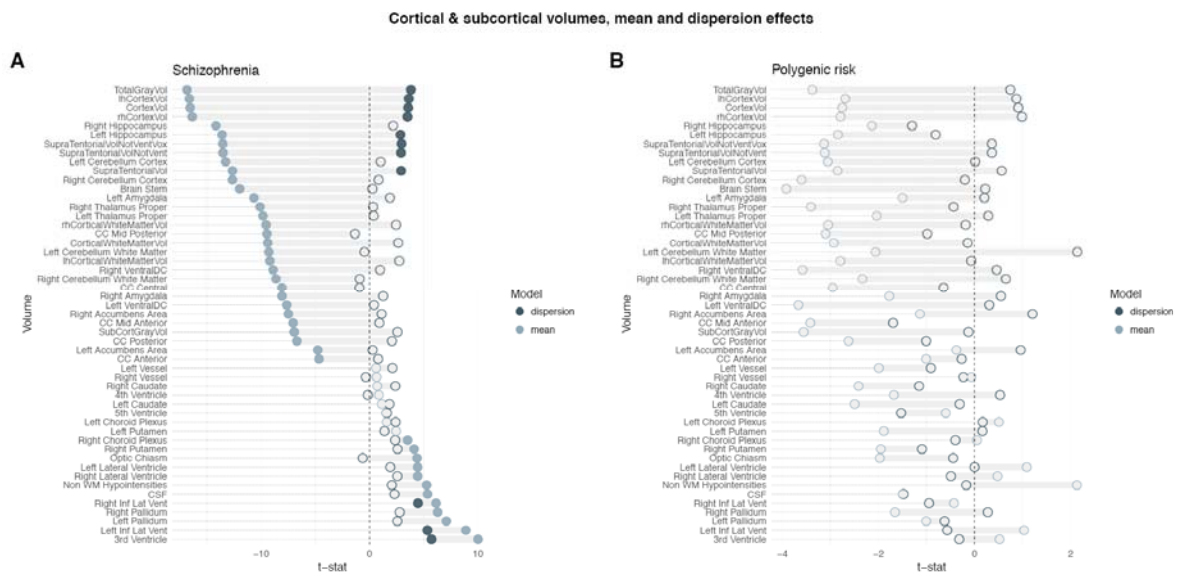

653

654 **eFigure 7: Cortical and subcortical volumes, without adjustment for eTIV.** t-statistic for  
 655 both mean (light blue) and dispersion (dark blue), filled dots mark significant effects after

656 correction for multiple comparisons across regions (5000 permutations, permuted  $p < .05$ ,  
657 FWE). **A:** The SZ-group showed decreased cortical and subcortical volumes, as well as  
658 increased ventricles and putamen and pallidum volumes. Cortical, right hippocampal and  
659 ventricle volumes were more heterogeneous in the SZ-group compared to healthy controls. **B:**  
660 Polygenic risk for SZ was not associated with mean changes nor dispersion in any of the  
661 regions.  
662  
663

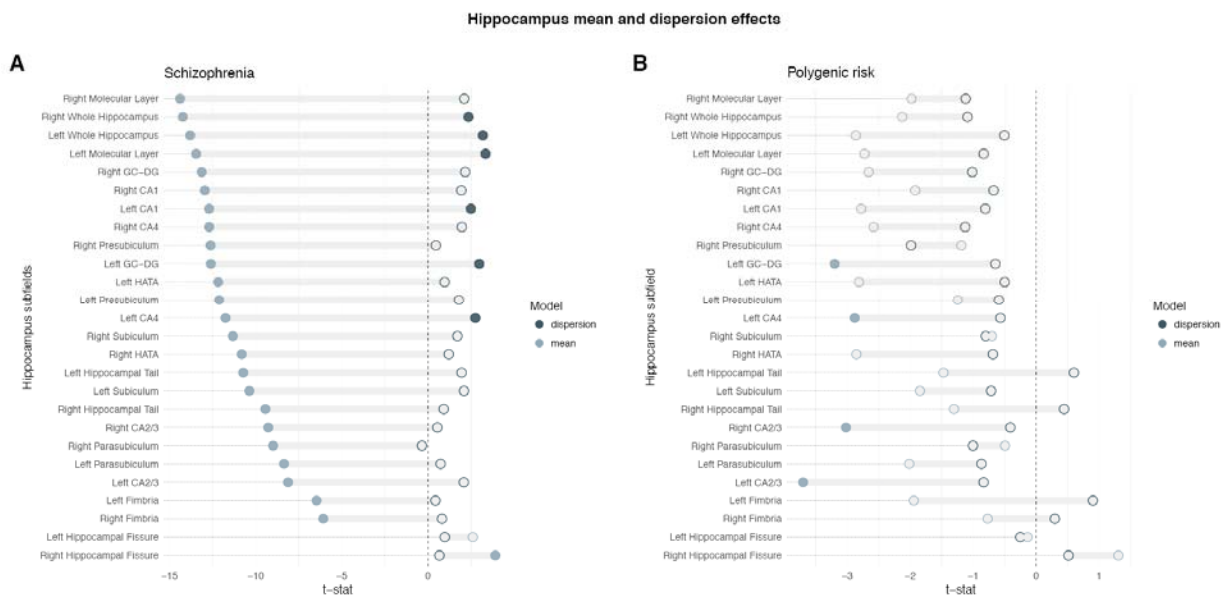

664  
665 **Figure 8: Hippocampus subfields volumes, without adjustment for eTIV.** t-statistic for  
666 both mean (light blue) and dispersion (dark blue), filled dots mark significant effects after  
667 correction for multiple comparisons across regions (5000 permutations, permuted  $p < .05$ ,  
668 FWE). **A:** The SZ-group had decreased hippocampal volumes, and this decrease was also  
669 evident in all subfields, accompanied with a decrease of the left hippocampal fissure. Bilateral  
670 hippocampal volumes were also more heterogeneous in the SZ-group, and among the  
671 subfields this effect was present in the left molecular layer, left CA1, left GC-DG and left  
672 CA4. **B:** Polygenic risk for SZ was associated with mean reductions of the left GC-DG, left

673 CA4, and bilateral CA2/3. Neither total hippocampal volumes nor any of the subfields  
674 showed a significant association between polygenic risk and volume heterogeneity.

| Sample               | Source                                                                                                                                  | Comment                                                                                                                                                                                                                                                                                                                                                                                                                                                                                                                                                                              | Reference |
|----------------------|-----------------------------------------------------------------------------------------------------------------------------------------|--------------------------------------------------------------------------------------------------------------------------------------------------------------------------------------------------------------------------------------------------------------------------------------------------------------------------------------------------------------------------------------------------------------------------------------------------------------------------------------------------------------------------------------------------------------------------------------|-----------|
| BrainGluSchi         | <a href="http://schizconnect.org/">http://schizconnect.org/</a><br>SchizConnect was funded by NIMH cooperative agreement IU01 MH097435. | Data obtained from COINS source. Supported by NIMH-grant R01MH084898-01A1.                                                                                                                                                                                                                                                                                                                                                                                                                                                                                                           | 1         |
| CIMH                 | Authors                                                                                                                                 | CIMH was supported by the Deutsche Forschungsgesellschaft (DFG, projects KI 576/14-2, ZI1253/3-1, ZI1253/3-2) and the European Community's Seventh Framework Programme (FP7/2007–2013) grant agreement #602450 (IMAGEMEND)                                                                                                                                                                                                                                                                                                                                                           | 2-4       |
| CNP 1 & 2 (DS000030) | <a href="https://openfmri.org/">https://openfmri.org/</a>                                                                               | Data sets were obtained from the OpenfMRI database. Data from 2 imaging sites. DS000030 was supported by the Consortium for Neuropsychiatric Phenomics (NIH Roadmap for Medical Research grants UL1-DE019580, RL1MH083268, RL1MH083269, RL1DA024853, RL1MH083270, RL1LM009833, PL1MH083271, and PL1NS062410).                                                                                                                                                                                                                                                                        | 5,6       |
| COBRE                | <a href="http://schizconnect.org/">http://schizconnect.org/</a>                                                                         | Data obtained from COINS source. Supported by grant 5P2ORR021938 /P20GM103472 from the NIH to Dr. Vince Calhoun.                                                                                                                                                                                                                                                                                                                                                                                                                                                                     | 7         |
| HUBIN                | Authors                                                                                                                                 | HUBIN was supported by the Swedish Research Council (2006-2992, 2006-986, K2007-62X-15077-04-1, 2008-2167, 2008-7573, K2010-62X-15078-07-2, K2012-61X-15078-09-3, 14266-01A,02-03, 2017-949), the regional agreement on medical training and clinical research between Stockholm County Council and the Karolinska Institutet, the Knut and Alice Wallenbergs Foundation and the HUBIN project                                                                                                                                                                                       | 8,9       |
| KaSP                 | Authors                                                                                                                                 | KaSP was supported by grants from the Swedish Medical Research Council (SE: 2009-7053; 2013-2838; SC: 523-2014-3467), the Swedish Brain Foundation, Ahlénstiftelsen, Svenska Läkaresällskapet, Petrus och Augusta Hedlunds Stiftelse, Torsten Söderbergs Stiftelse, the AstraZeneca-Karolinska Institutet Joint Research Program in Translational Science, Söderbergs Konungliga Stiftelse, Professor Bror Gadelius Minne, Knut och Alice Wallenbergs stiftelse, Stockholm County Council (ALF and PPG), Centre for Psychiatry Research, KID-funding from the Karolinska Institutet. | 10,11     |
| MCIC-1/2/3           | <a href="http://schizconnect.org/">http://schizconnect.org/</a>                                                                         | Data obtained from COINS source. MCIC was supported by the Department of Energy under Award Number DE-FG02-08ER64581.                                                                                                                                                                                                                                                                                                                                                                                                                                                                | 12        |
| NUNDA                | <a href="http://schizconnect.org/">http://schizconnect.org/</a>                                                                         | Data obtained from schizconnect.org. Source: NUNDA Supported by NIMH grant MH056584.                                                                                                                                                                                                                                                                                                                                                                                                                                                                                                 | 13        |
| NUSDAST              | <a href="http://schizconnect.org/">http://schizconnect.org/</a>                                                                         | Data obtained from schizconnect.org. Source: NU_REDCAP. Supported by NIMH Grant 1R01 MH084803                                                                                                                                                                                                                                                                                                                                                                                                                                                                                        | 14,15     |
| TOP3T 1 & 2, TOP-1.5 | Authors                                                                                                                                 | The work was funded by the Research Council of Norway (213837, 223273, 204966/F20, 213694, 229129, 249795/F20, 248778), the South-Eastern Norway Regional Health Authority (2013-123, 2014-097, 2015-073, #2017-112) and Stiftelsen Kristian Gerhard Jebsen.                                                                                                                                                                                                                                                                                                                         | 16-19     |
| UKB                  | <a href="https://www.ukbiobank.ac.uk">https://www.ukbiobank.ac.uk</a>                                                                   | This research has been conducted using the UK Biobank Resource (access code 27412)                                                                                                                                                                                                                                                                                                                                                                                                                                                                                                   | 20        |
| UNIBA                | Authors                                                                                                                                 | This work was supported by a “Capitale Umano ad Alta Qualificazione” grant by Fondazione Con Il Sud awarded to Alessandro Bertolino and by a Hoffmann-La Roche Collaboration Grant awarded to Giulio Pergola. This project has received funding from the European Union Seventh Framework Programme for research, technological development and demonstration under grant agreement no. 602450 (IMAGEMEND). This paper reflects only the author's views and the European Union is not liable for any use that may be made of the information contained therein.                      | 21        |

675

676 **eTable1: Summary of included samples.** We included publicly available data as well as data

677 provided by co-authors. Sample reference list contains publications related to the sample as

678 well as data sources.

679

| Volume                        | SZ mean (t) | SZ Disp (t) | SZ mean outlier (t) | SZ disp outlier (t) |
|-------------------------------|-------------|-------------|---------------------|---------------------|
| TotalGrayVol                  | -18,04      | 3,41        | -17,97              | 2,19                |
| lhCortexVol                   | -17,20      | 3,15        | -17,15              | 2,03                |
| CortexVol                     | -17,05      | 3,24        | -17,07              | 1,63                |
| rhCortexVol                   | -16,65      | 3,20        | -16,68              | 1,23                |
| Right-Hippocampus             | -13,86      | 2,43        | -12,49              | 1,83                |
| Left-Hippocampus              | -13,83      | 2,39        | -11,66              | 2,51                |
| SupraTentorialVolNotVentVox   | -12,85      | 2,40        | -13,69              | 0,17                |
| SupraTentorialVolNotVent      | -12,41      | 1,99        | -13,65              | 0,17                |
| Left-Cerebellum-Cortex        | -11,69      | 2,92        | -11,20              | -0,65               |
| SupraTentorialVol             | -11,43      | -0,09       | -12,63              | 0,03                |
| Right-Cerebellum-Cortex       | -10,69      | -0,09       | -10,53              | -0,19               |
| Brain-Stem                    | -9,64       | -0,91       | -9,20               | -1,08               |
| Left-Amygdala                 | -8,82       | 1,86        | -8,60               | 1,58                |
| Right-Thalamus-Proper         | -8,35       | -1,32       | -7,00               | 1,96                |
| Left-Thalamus-Proper          | -7,53       | 0,45        | -6,83               | 2,12                |
| rhCorticalWhiteMatterVol      | -7,11       | -0,97       | -6,12               | 0,75                |
| CC_Mid_Posterior              | -7,09       | 0,93        | -8,25               | -1,81               |
| CorticalWhiteMatterVol        | -6,97       | -1,17       | -6,26               | 1,49                |
| Left-Cerebellum-White-Matter  | -6,82       | 2,27        | -7,38               | -1,42               |
| lhCorticalWhiteMatterVol      | -6,64       | 2,24        | -6,15               | 1,89                |
| Right-VentralDC               | -6,35       | 2,22        | -5,87               | 0,12                |
| Right-Cerebellum-White-Matter | -6,25       | -1,47       | -6,34               | -1,30               |
| CC_Central                    | -6,18       | -0,14       | -7,15               | -0,95               |
| Right-Amygdala                | -6,16       | 0,81        | -6,03               | 1,51                |
| Left-VentralDC                | -5,82       | 1,13        | -4,44               | -1,19               |
| Right-Accumbens-area          | -5,78       | 0,91        | -5,18               | 0,76                |
| CC_Mid_Anterior               | -4,81       | 2,37        | -6,31               | -0,27               |
| SubCortGrayVol                | -4,63       | -1,30       | -2,72               | 1,57                |
| CC_Posterior                  | -3,28       | -0,04       | -4,57               | 1,44                |
| Left-Accumbens-area           | -3,26       | 2,04        | -2,80               | -0,20               |
| CC_Anterior                   | -2,33       | 1,05        | -2,14               | -0,18               |
| Left-vessel                   | 1,37        | 2,03        | 0,79                | 0,09                |
| Right-vessel                  | 1,69        | -0,39       | 1,94                | -0,03               |
| Right-Caudate                 | 2,16        | 1,56        | 4,60                | 1,57                |
| 4th-Ventricle                 | 2,29        | -0,05       | 2,51                | 0,66                |
| Left-Caudate                  | 4,00        | 2,20        | 4,76                | 1,57                |
| 5th-Ventricle                 | 4,80        | 1,89        | 0,68                | 0,09                |
| Left-choroid-plexus           | 5,05        | 1,74        | 4,07                | 1,72                |
| Left-Putamen                  | 5,48        | 0,62        | 5,62                | 0,06                |
| Right-choroid-plexus          | 5,67        | -0,91       | 6,52                | 2,43                |
| Right-Putamen                 | 6,44        | 4,48        | 7,94                | 0,20                |
| Optic-Chiasm                  | 6,48        | 2,17        | 5,83                | -0,86               |
| Left-Lateral-Ventricle        | 7,03        | 2,70        | 7,50                | 1,74                |
| Right-Lateral-Ventricle       | 7,09        | 1,88        | 6,94                | 2,18                |
| non-WM-hypointensities        | 7,40        | 1,54        | 8,19                | 1,69                |
| CSF                           | 8,19        | 1,95        | 5,31                | 2,04                |
| Right-Inf-Lat-Vent            | 8,82        | 3,18        | 9,83                | 1,53                |
| Right-Pallidum                | 9,55        | 2,33        | 9,70                | 1,99                |
| Left-Pallidum                 | 9,57        | 2,21        | 9,60                | 3,87                |
| Left-Inf-Lat-Vent             | 9,77        | 5,57        | 12,03               | 4,19                |
| 3rd-Ventricle                 | 12,24       | 5,78        | 9,741               | 4,190               |

680

681 **eTable2: SZ cortical and subcortical analysis with and without outlier removal. We**

682 excluded participants based on extreme values (described in Methods) and reran mean and

683 dispersion models without these participants.

| Hippocampus subfield      | SZ mean (t) | SZ Disp (t) | SZ mean outlier (t) | SZ disp outlier (t) |
|---------------------------|-------------|-------------|---------------------|---------------------|
| Right Molecular Layer     | -12,98      | 1,71        | -12,53              | 1,54                |
| Right Whole Hippocampus   | -12,86      | 2,16        | -12,58              | 1,74                |
| Left Whole Hippocampus    | -12,23      | 3,45        | -12,28              | 2,30                |
| Left Molecular Layer      | -11,78      | 3,45        | -11,70              | 2,43                |
| Right GC-DG               | -11,48      | 1,85        | -11,11              | 1,61                |
| Right CA1                 | -11,37      | 1,18        | -10,89              | 1,00                |
| Left CA1                  | -11,00      | 2,18        | -11,10              | 1,04                |
| Right CA4                 | -10,99      | 1,55        | -10,67              | 1,39                |
| Right presubiculum        | -10,81      | 0,71        | -10,45              | 0,46                |
| Left GC-DG                | -10,72      | 3,22        | -10,62              | 2,33                |
| Left HATA                 | -10,57      | 1,04        | -10,57              | 0,56                |
| Left presubiculum         | -10,36      | 2,18        | -10,44              | 1,27                |
| Left CA4                  | -9,80       | 3,00        | -9,69               | 2,30                |
| Right subiculum           | -9,36       | 1,71        | -9,23               | 1,12                |
| Right HATA                | -9,23       | 2,01        | -8,81               | 0,90                |
| Left Hippocampal tail     | -8,99       | 0,89        | -9,06               | 1,14                |
| Left subiculum            | -8,34       | 2,22        | -8,30               | 1,22                |
| Right Hippocampal tail    | -7,81       | 0,91        | -7,36               | 0,43                |
| Right CA2/3               | -7,31       | 0,02        | -6,87               | 0,23                |
| Right parasubiculum       | -7,18       | -0,55       | -7,15               | -0,57               |
| Left parasubiculum        | -6,56       | 0,78        | -6,37               | 0,35                |
| Left CA2/3                | -6,14       | 2,14        | -6,20               | 1,47                |
| Left fimbria              | -4,66       | 0,30        | -4,52               | 0,65                |
| Right fimbria             | -4,36       | 0,51        | -4,23               | 1,10                |
| Left hippocampal fissure  | 3,99        | 0,83        | 4,71                | 0,23                |
| Right hippocampal fissure | 5,93        | 0,57        | 6,33                | -0,28               |

684

685 **eTable3: SZ hippocampal subfields analysis with and without outlier removal. We**  
 686 excluded participants based on extreme values (described in Methods) and reran mean and  
 687 dispersion models without these participants.

688

| Hippocampus subfield      | PRS mean (t) | PRS Disp (t) | PRS mean MDS (t) | PRS disp MDS (t) | PRS mean outlier (t) | PRS disp outlier (t) | PCA1 mean (t) | PCA1 disp (t) |
|---------------------------|--------------|--------------|------------------|------------------|----------------------|----------------------|---------------|---------------|
| Left CA2/3                | -3,00        | -1,08        | -2,99            | -0,90            | -2,67                | -1,07                | -2,76         | -0,48         |
| Left GC-DG                | -2,26        | -0,93        | -2,15            | -0,70            | -2,10                | -1,43                | -1,95         | -0,12         |
| Right CA2/3               | -2,20        | -0,56        | -2,10            | -0,15            | -1,98                | -0,11                | -2,34         | 0,21          |
| Left CA4                  | -1,95        | -0,87        | -1,86            | -0,65            | -1,70                | -1,35                | -1,65         | -0,13         |
| Left Whole hippocampus    | -1,83        | -0,61        | -1,62            | -0,34            | -1,68                | -1,12                | -1,36         | -0,19         |
| Right HATA                | -2,04        | -0,81        | -1,96            | -0,64            | -2,18                | -0,92                | -2,39         | -0,82         |
| Left HATA                 | -2,15        | -0,65        | -2,14            | -0,37            | -2,03                | -0,87                | -2,06         | -0,47         |
| Left CA1                  | -1,79        | -0,70        | -1,55            | -0,45            | -1,87                | -1,38                | -1,41         | -0,32         |
| Left molecular layer      | -1,71        | -0,86        | -1,47            | -0,65            | -1,48                | -1,58                | -1,31         | -0,47         |
| Right GC-DG               | -1,61        | -1,18        | -1,39            | -0,86            | -1,59                | -0,87                | -1,51         | -0,43         |
| Right CA4                 | -1,54        | -1,31        | -1,33            | -0,94            | -1,44                | -0,78                | -1,45         | -0,63         |
| Right Whole hippocampus   | -0,90        | -1,17        | -0,56            | -0,82            | -0,82                | -1,03                | -0,37         | -0,63         |
| Left parasubiculum        | -1,37        | -1,13        | -1,35            | -0,88            | -1,09                | -0,70                | -1,50         | -0,65         |
| Right molecular layer     | -0,81        | -1,17        | -0,46            | -0,83            | -0,84                | -0,84                | -0,35         | -0,60         |
| Left fimbria              | -1,25        | 0,73         | -1,29            | 0,89             | -1,73                | 0,78                 | -1,90         | 0,55          |
| Right CA1                 | -0,82        | -0,76        | -0,54            | -0,39            | -0,81                | -0,66                | -0,36         | -0,11         |
| Left subiculum            | -0,79        | -0,76        | -0,58            | -0,59            | -0,72                | -1,62                | -0,57         | -0,69         |
| Left Hippocampal tail     | -0,82        | 0,58         | -0,75            | 0,77             | -0,91                | 0,99                 | 0,04          | 0,74          |
| Right Hippocampal tail    | -0,53        | 0,47         | -0,41            | 0,70             | -0,46                | 0,48                 | 0,66          | 0,42          |
| Left presubiculum         | -0,32        | -0,52        | -0,07            | -0,37            | 0,07                 | -0,60                | 0,17          | -0,35         |
| Right presubiculum        | -0,15        | -1,67        | 0,23             | -1,40            | 0,49                 | -1,29                | 0,62          | -0,85         |
| Right fimbria             | -0,15        | 0,24         | -0,12            | 0,50             | -0,78                | 0,12                 | -0,67         | 0,64          |
| Right subiculum           | 0,54         | -0,63        | 0,85             | -0,27            | 0,57                 | -0,45                | 0,93          | 0,05          |
| Right parasubiculum       | 0,21         | -0,98        | 0,36             | -0,80            | 0,74                 | 0,03                 | 0,40          | -0,27         |
| Left hippocampal fissure  | 0,46         | -0,16        | 0,60             | -0,21            | 0,41                 | -0,52                | 0,64          | -0,09         |
| Right hippocampal fissure | 2,12         | 0,73         | 2,30             | 0,83             | 2,19                 | 0,88                 | 2,35          | 0,60          |

689

690 **eTable4: SZ-PRS hippocampal subfields analysis with and without outlier removal. We**  
 691 excluded participants based on extreme values (described in Methods) and reran mean and  
 692 dispersion models without these participants.



693 **eMethods:**

694

695 *Samples:* For the case-control analysis of cortical thickness and cortical and subcortical

696 volumes we included MRI-scans from 16 cross-sectional study samples with a total of 3161

697 participants of which 2010 were healthy controls, and 1151 patients diagnosed with SZ. The

698 case-control hippocampus subfield analysis was performed in a sub-sample of 2870

699 participants. The polygenic risk analysis was performed in a non-overlapping sample

700 consisting of 12490 participants from the UK Biobank (UKB) that had MRI scans and genetic

701 data available, all scanned on the same scanner<sup>35</sup>. All UKB participants diagnosed with any

702 ICD-10 mental or neurological disorder were excluded.

703

704 *Genetics:* Filtering include removal of SNPs with ambiguous alleles (AT or CG) and of

705 variants in the major histocompatibility complex (MHC; chromosome 6, 26-33Mb), and

706 pruning of SNPs based on linkage disequilibrium (LD) and p-value. All variants in LD with

707 the local SNP with the smallest p-value were removed (the SNP with the smallest p-value

708 within a 250kb window was retained, and all neighbours with a LD  $r^2 > 0.1$  were removed; a

709 step known as clumping).

710

711 *DGLM:* Modeling the dispersion is important for obtaining correct mean parameter estimates

712 if dispersion varies as a function of the predictor, and also allows for systematic investigation

713 into factors associated variability in observations<sup>45</sup>. DGLMs were fitted using the following

714 model specifications for both the mean and dispersion part; case control:  $Y \sim Age + Sex + SZ$

715 , and for polygenic risk:  $Y \sim Age + Sex + PRS$ , where Y is the mean in the first step, and the

716 dispersion in the second step. For the group comparison we then obtain an estimate of the

717 mean difference between groups, as well as an estimate of the difference in dispersion around

718 the mean between SZ and controls for the outcome measure. For the PRS, we obtain an

719 estimate of the linear relationship with PRS and an estimate of the relationship between PRS  
720 and the dispersion of the outcome measure.

721  
722 *Permutation:* Due to the computational demand of the vertex-wise analysis (~5 minutes pr.  
723 data chunk, one permutation totals 328 chunks) we ran 600 permutations for each model  
724 (case-control, polygenic risk) before fitting a generalized Pareto distribution to the tail of the  
725 permutation distribution<sup>47</sup>. For transparency both the raw and fitted permuted p-values are  
726 provided.

727  
728 *Outliers:* Participants with a z-score for either eTIV or for volume of interest at  $|z| > 3$  were  
729 removed, as well as participants with extreme values based on a statistical outlier-test  
730 (Rpackage: car<sup>49</sup>, corrected  $p < .05$  for the linear models  $Y \sim Age + Sex + SZ$  and  $Y \sim Age +$   
731  $Sex + PRS$ ).

732  
733 *PRS-PCA:* PCA was performed on SZ-PRS scores from p-thresholds  $p < .001$  to  $p < .05$  (500  
734 thresholds, steps of .001), before extracting subject loadings from the first three principal  
735 components for associations with cortical thickness. The first three principal components  
736 explained 92.5%, 3.1% and 1.8% of the variance, respectively (eFigure 1A). The first  
737 component (PRS-PC1) showed high correlation with PRS across all thresholds, but relatively  
738 lower correlations for the PRS calculated at the stricter p-thresholds compared to the PRS  
739 calculated using more lenient p-thresholds. Component 2 (PRS-PC2) correlated negatively  
740 with PRS from the stricter p-thresholds, and positive with more lenient p-thresholds.  
741 Component 3 (PRS-PC3) was positively correlated with scores calculated with the strictest  
742 and most lenient p-thresholds, while correlating negatively with PRS based on the  
743 intermediate p-thresholds (eFigure 1B).

744
